1  
2 **Total RNA-sequencing reveals multi-level microbial community**  
3 **changes and functional responses to wood ash application in**  
4 **agricultural and forest soil**

5  
6 Toke Bang-Andreasen<sup>1,2</sup>, Muhammad Zohaib Anwar<sup>1</sup>, Anders Lanzén<sup>3,4,5</sup>, Rasmus Kjøller<sup>2</sup>, Regin  
7 Rønn<sup>2,6,7</sup>, Flemming Ekelund<sup>2\*</sup>, and Carsten Suhr Jacobsen<sup>1</sup>.

8  
9 <sup>1</sup>Department of Environmental Science, Aarhus University, RISØ campus, Roskilde, Denmark. <sup>2</sup>Department of  
10 Biology, University of Copenhagen, Copenhagen, Denmark. <sup>3</sup>Department of Conservation of Natural Resources,  
11 NEIKER-Tecnalia, Bizkaia Technology Park, Derio, Spain. <sup>4</sup>AZTI-Tecnalia, Herrera Kaia, Pasaia, Spain.  
12 <sup>5</sup>IKERBASQUE, Basque Foundation for Science, Bilbao, Spain. <sup>6</sup>Key Laboratory of Urban Environment and Health,  
13 Institute of Urban Environment, Chinese Academy of Sciences, Xiamen, China. <sup>7</sup>Arctic Station, University of  
14 Copenhagen, Qeqertarsuaq, Greenland.

15  
16 \*Corresponding Author: Flemming Ekelund, fekelund@bio.ku.dk  
17

18 **Abstract**

19 Recycling of wood ash from energy production may counteract soil acidification and return  
20 essential nutrients to soils. However, wood ash amendment affects soil physicochemical  
21 parameters that control composition and functional expression of the soil microbial  
22 community. Here, we applied Total RNA-sequencing to simultaneously assess the impact  
23 of wood ash amendment on the active soil microbial communities and the expression of  
24 functional genes from all microbial taxa. Wood ash significantly affected the taxonomic  
25 (rRNA) as well as functional (mRNA) profiles of both agricultural and forest soil. Increase  
26 in pH, electrical conductivity, dissolved organic carbon and phosphate were the most  
27 important physicochemical drivers for the observed changes. Wood ash amendment  
28 increased the relative abundance of the copiotrophic groups Chitinophagaceae  
29 (Bacteroidetes) and Rhizobiales (Alphaproteobacteria) and resulted in higher expression  
30 of genes involved in metabolism and cell growth. Finally, Total RNA-sequencing allowed  
31 us to show that some groups of bacterial feeding protozoa increased concomitantly to the

32 enhanced bacterial growth, which shows their pivotal role in the regulation of bacterial

33 abundance in soil.

34

35 *Keywords: Metatranscriptomics, Total RNA, wood ash, soil micro-biome, biodiversity, soil biota, mRNA,*

36 *rRNA, renewable energy, protozoa.*

## 37 **1. Introduction**

38 Wood ash from energy production is often considered a waste product (Vance, 1996;  
39 Demeyer *et al.*, 2001) despite that recycling of wood ash may have beneficial effects as it  
40 counteracts acidification and returns essential nutrients to soil (Demeyer *et al.*, 2001;  
41 Augusto *et al.*, 2008). Wood combustion is becoming more popular in several countries  
42 and increased reuse of wood ash as soil amendment holds the potential to improve the  
43 sustainability of this practice (Karlton *et al.*, 2008; Huotari *et al.*, 2015). However, wood ash  
44 application affects several soil physicochemical parameters important to the structure and  
45 function of microbial communities; e.g. pH, electrical conductivity and dissolved organic  
46 carbon (DOC), (Ohno & Susan Erich, 1990; Demeyer *et al.*, 2001; Pitman, 2006; Augusto  
47 *et al.*, 2008; Maresca *et al.*, 2017; Hansen *et al.*, 2017). As the soil micro-biota carries out  
48 an array of key biochemical processes (Blagodatskaya & Kuzyakov, 2013), knowledge of  
49 its response to disturbance is important; not least in production soils due to potential  
50 impact on soil fertility.

51 The soil micro-biome, which includes prokaryotes as well as micro-eukaryotes, is one of  
52 the most diverse and complex biomes on Earth. It has a pivotal role in nutrient cycling and  
53 carbon sequestration and is a key component in the maintenance of soil fertility of  
54 managed ecosystems (Wall *et al.*, 2012; Fierer, 2017). Wood ash amendment causes  
55 changes in soil micro-biome composition, activity and quantity (Perkiömäki & Fritze, 2002;  
56 Aronsson & Ekelund, 2004; Huotari *et al.*, 2015). Ash amendment induces changes in  
57 community structure followed by increased microbial activity and growth, which is usually  
58 explained by the increased soil pH brought about by the alkaline oxides in the ash (Cruz-  
59 Paredes *et al.*, 2017; Vestergård *et al.*, 2018). Still, some studies show no or only minor  
60 microbial response to wood ash application (Aronsson *et al.* 2004; Huotari *et al.* 2015).

61 Only few studies have concomitantly analysed microorganisms from all domains of life (i.e.  
62 Archaea, Bacteria, Eukaryotes) and most of these rely on cultivation, model organisms or  
63 molecular fingerprinting, which only provide limited resolution of taxonomical and  
64 functional responses. Total RNA-sequencing, or metatranscriptomics, makes it possible to  
65 investigate active soil microbial communities from all domains of life, incl. their  
66 transcriptional activity, simultaneously. Because total RNA-sequencing allows for the study  
67 of immediate regulatory responses to environmental changes (Carvalhais *et al.*, 2012), it  
68 has also proven useful in the assessment of active microbial communities' functional roles  
69 in soil (Urich *et al.*, 2008; Hultman *et al.*, 2015; Epelde *et al.*, 2015; Geisen *et al.*, 2015;  
70 Schostag *et al.*, 2019).

71 We therefore aimed to investigate how the active soil prokaryotic and micro-eukaryotic  
72 communities in agricultural and forest soil responded structurally and functionally  
73 (transcriptional) to wood ash application. Both soil types are relevant for large scale  
74 application of wood ash. We applied wood ash in concentrations corresponding to field  
75 application of 0, 3, 12 and 90 t ha<sup>-1</sup>, where 3 t ha<sup>-1</sup> is the currently allowed dose in  
76 Scandinavian countries. We expected wood ash to increase soil pH, electrical conductivity  
77 and dissolved organic carbon and therefore hypothesised that (I) the pH increase would  
78 favour bacteria more than fungi, (II) the nutrients in the wood ash would benefit the  
79 copiotrophic microbial groups, (III) multitrophic responses would appear gradually over  
80 time after wood ash application, and (IV) that microbial stress responses would be  
81 observable in the transcriptome.

## 82 **2. Materials & Methods**

### 83 **2.1. Soils and wood ash**

84 We used two contrasting soils for the experiment. The first was a loamy sand (Typic  
85 Hapludult) from the plough layer (0-10 cm) of an agricultural field (Research Center  
86 Foulum, DK, 56°29'42"N 9°33'36"E). The other was from the O-horizon (0-10 cm) of a  
87 forest (Gedhus, DK, 56°16'38"N 09°05'12"E). The forest is a second-generation Norway  
88 spruce stand (*Picea abies* (L.) Karst.) on Podzol heathland. Qin *et al.* (2017) provide soil  
89 characteristics for both soils. On both sites, we removed visible plant parts before taking  
90 ten 100 g soil samples within a 30 m<sup>2</sup> area. The 10 samples from each site were sieved (4  
91 mm), pooled and stored in the dark at 4 °C until further processing.

92 Wood ash was a mixture of bottom- and fly-ash from a heating plant (Brandø, Denmark)  
93 produced by combustion of wood chips from predominantly coniferous trees. We  
94 homogenized the ash by sieving (2 mm). Maresca *et al.* (2017) provide a list of mineral  
95 nutrients and heavy metals in the ash.

96

## 97 **2.2. Microcosm set-up and incubation**

98 We prepared microcosms in triplicates of 50 g soil in 250 ml sterilised airtight glass jars.  
99 We mixed the ash thoroughly with soil to ash concentrations corresponding to field  
100 application of 0, 3, 12 and 90 t ash ha<sup>-1</sup>. The water content was adjusted to 50 % of the  
101 water holding capacity of the two soils. We prepared 12 microcosms for each soil-ash  
102 combination to allow four destructive samplings; i.e. a total of 96 microcosms. Samples  
103 were also collected at the start of the experiment. Microcosms were incubated at 10 °C in  
104 the dark and all microcosms were opened once a week inside a LAF-bench to maintain  
105 aerobic conditions.

106

### 107 **2.3. Physicochemical soil parameters**

108 At destructive sampling, after 3, 10, 30 and 100 days of incubation, we prepared soil  
109 extracts from 15 g soil and 75 ml sterile ddH<sub>2</sub>O followed by 1 h shaking and settling for 0.5  
110 h. In the supernatant, we measured electrical conductivity using a TetraCon 325 electrode  
111 adapted to a conductivity meter Cond 340i (WTW, Weilheim, Germany) and pH using a pH  
112 electrode (Sentix Mic) connected to pH meter Multi 9310 (WTW). The remaining  
113 supernatant was filtered (5C filters, Advantec, Tokyo, Japan; 1 µm pore size) and analysed  
114 for dissolved organic carbon (DOC), nitrate (NO<sub>3</sub><sup>-</sup>), ammonium (NH<sub>4</sub><sup>+</sup>) and phosphate  
115 (PO<sub>4</sub><sup>3-</sup>). DOC concentrations were determined on a TOC-5000A (Shimadzu, Kyoto, Japan).  
116 Nitrate, ammonium and phosphate concentrations were determined by flow injection  
117 analysis (FIAstar™ 5000, FOSS, Hillerød, Denmark) following manufacturer's instructions.

118

### 119 **2.4. Nucleic acid extraction, qPCR and library preparation for sequencing**

120 RNA and DNA were co-extracted from 2 g soil samples using the RNA PowerSoil Total  
121 RNA Isolation Kit (MOBIO, Carlsbad, USA) in combination with DNA Elution Accessory Kit  
122 (MOBIO) following manufacturer's protocol. Agricultural soil amended with the highest ash  
123 concentration had an RNA yield below detection limit and was not sequenced.

124 We quantified 16S rRNA and ITS2 gene copies (DNA level) using qPCR. 16S rRNA genes  
125 were amplified in technical duplicates using a CFX Connect (Bio-Rad, Richmond, USA).

126 We used a dilution series of genomic DNA from *Escherichia coli* K-12 (with 7 copies of  
127 16S rRNA genes) as a standard (Blattner *et al.*, 1997). The master-mix consisted of 2 µl  
128 bovine serum albumin (BSA) (20mg/ml; BIORON, Ludwigshafen, Germany), 10 µl SsoFast  
129 EvaGreen Supermix (Bio-Rad), 0.8 µl of primer 341f (5'-CCTAYGGGRBGCASCAG-3'),

130 0.8  $\mu$ l of primer 806r (5'-GGACTACNNGGGTATCTAAT-3') (Hansen *et al.*, 2012); 1  $\mu$ l of  
131 10 $\times$  diluted template, and 5.4  $\mu$ l sterile DEPC-treated water. PCR conditions for 16S rRNA  
132 gene amplification were 98°C for 15 min, followed by 35 cycles of 98°C for 30 s, 56°C for  
133 30 s, and 72°C for 30 s (with fluorescence measurements) and ending with 72°C for 7 min  
134 and production of melt curves. The PCR efficiencies for the 16S assays were  $96.1 \pm 1.0\%$   
135 (SEM, n=3) with  $R^2 = 0.99 \pm 0.001$ . ITS gene copies were quantified as described for the  
136 16S rRNA above with minor modifications: Vector cloned ITS2 DNA regions from  
137 *Aureobasidium pullulans* were included as standards, primers used were gITS7 (5'-  
138 GTGARTCATCGARTCTTTG-3' (Ihrmark *et al.*, 2012)) and ITS4 (5'-  
139 TCCTCCGCTTATTGATATGC-3' (White *et al.*, 1990)), annealing temperature was 60 °C  
140 and 40 amplification cycles were used. The PCR efficiencies for the ITS assays were  
141  $106.0 \pm 4.6\%$  with  $R^2 = 0.99 \pm 0.003$ .

142 Prior to Total RNA library building, we removed potential DNA carryovers using the DNase  
143 Max Kit (MOBIO) following manufacturer's protocol. Successful DNA removal of RNA  
144 extracts were tested with the 16S qPCR protocol described above but with 50 amplification  
145 cycles: All DNase treated RNA extracts had higher or equal Cq values than the negative  
146 samples (sterile DEPC-treated water as template) and DNA was thereby not present.

147 Quality of the DNase treated RNA was tested using RNA 6000 Nano Kit (Agilent, Santa  
148 Clara, USA) on a 2100 Bioanalyzer System (Agilent) following manufacturer's protocol  
149 (Average RIN number was  $7.85 \pm 0.13$  (SEM, n=69))

150 Subsequently, DNase treated RNA extracts from time points 0, 3, 30 and 100 days were  
151 fragmented into ~150 bp segments and prepared for sequencing using the NEBNext Ultra  
152 Directional RNA Library Prep Kit for Illumina in combination with the NEBNext Multiplex

153 Oligos for Illumina (New England BioLabs, Ipswich, USA) according to the manufacturer's  
154 protocol. We sequenced the resulting metatranscriptome libraries using HiSeq 2500  
155 (Illumina Inc., San Diego, USA) in high output mode (8 HiSeq lanes, 125bp, paired end  
156 reads) at the National High-throughput DNA Sequencing Centre (Copenhagen, Denmark).

157

## 158 **2.5. Bioinformatic processing**

159 We obtained a total of 3.3 billion paired sequences (SRA accession number:  
160 PRJNA512608) and processed them through the following bioinformatic pipeline.  
161 Adapters, poly-A tails, sequences shorter than 60 nt and nucleotides with phred score  
162 below 20 at the 5' and 3' end of sequences were removed using Cutadapt v.1.9.1 (Martin,  
163 2011). Five samples were removed prior to subsequent processing due to low quality of  
164 reads (one replicate of 3 t ha<sup>-1</sup>, day 100 from the agricultural soil and two replicates of 0 t  
165 ha<sup>-1</sup>, day 0 and two replicates 0 t ha<sup>-1</sup>, day 100 from the forest soil). Sequences were then  
166 sorted into small subunit (SSU) rRNA, large subunit (LSU) rRNA and non-rRNA  
167 sequences using SortMeRNA v.2.1 (Kopylova *et al.*, 2012).

168

### 169 **2.5.1. rRNA**

170 A subset of 1.5 million randomly chosen SSU rRNA sequences per sample were  
171 assembled into longer SSU rRNA contigs using EMIRGE (Miller *et al.*, 2011). Contigs were  
172 taxonomically classified using CREST (Lanzén *et al.*, 2012) and rRNA reads were mapped  
173 to resulting EMIRGE contigs using BWA (Li & Durbin, 2009), as in Epelde *et al.* (2015),  
174 resulting in a table of taxonomically annotated read abundance across samples  
175 (Supplementary Datasheet 1).



176

## 177 **2.5.2. mRNA**

178 A combined pool of non-ribosomal sequences from all samples was assembled using  
179 trinity v.2.0.6 (Grabherr *et al.*, 2011). From the resulting assembled contigs, non-coding  
180 RNA contigs were filtered away by aligning contigs to the Rfam database v.12.0 (Nawrocki  
181 *et al.*, 2015) using cmsearch v.1.1.1 with a significant e-value threshold of  $<10^{-3}$ . Input  
182 sequences used for non-ribosomal RNA assembly were then mapped to coding mRNA  
183 contigs. We normalized the contigs by removing those with relative expression lower than  
184 1 out of the number of sequences in the dataset with least number of sequences.  
185 EMBOSS (Rice *et al.*, 2000) was used to search six possible open reading frames (ORFs)  
186 of the contigs. SWORD (Vaser *et al.*, 2016) was used to align ORFs against the Md5nr  
187 protein database (Wilke *et al.*, 2012). The output was then parsed with custom Python  
188 scripts and filtered hits with minimum e-value of  $10^{-5}$  as threshold. Best hit for each contig  
189 was then selected based on alignment statistics and annotated against the eggnoG  
190 hierarchical database v.4.5 (Jensen *et al.*, 2008). The output was an abundance table of  
191 numbers of sequences assigned to groups of different functional genes (COGs)  
192 (Supplementary Datasheet 2).

193

## 194 **2.6. Statistical analysis and data processing**

195 Statistical validation for both taxonomy and functional abundance was done in R v.3.4.0 (R  
196 Core Team, 2015) using *vegan* (Oksanen *et al.*, 2008). The rRNA abundance was  
197 converted into relative abundance and collapsed taxonomically into Archaea, Bacteria and  
198 Eukaryota. We further grouped Eukaryota into Fungi, Metazoa, and protists (with main

199 focus on bacterivorous protozoa). We calculated Richness and Shannon diversity on the  
200 total number of rRNA contigs and abundance of sequence reads mapped to them. Non-  
201 metric multidimensional scaling (NMDS) was carried out using Bray-Curtis dissimilarities of  
202 community composition between samples. Soil physicochemical parameters were fitted to  
203 the resulting NMDS using the function *envfit*. Variables explaining overall differences in  
204 community composition were evaluated using the function *Adonis*, which performs  
205 permutational analysis of variance (PERMANOVA; 10,000 permutations) using Bray-Curtis  
206 dissimilarities as response variable. A forward selection strategy was carried out to only  
207 include explanatory variables with significant p-values in *Adonis* models.

208 Significant effects of wood ash amendment and incubation time on taxonomic groups were  
209 determined using non-parametric Kruskal-Wallis tests (due to the non-normal distribution  
210 of taxon abundances). To separate the pronounced changes in community responses  
211 observed at the 90 t ha<sup>-1</sup> amendment in the forest soil from the less pronounced changes  
212 observed at 0-12 t ha<sup>-1</sup>, we performed Kruskal-Wallis tests with wood ash concentration as  
213 independent variable for both the range of 0-12 t ha<sup>-1</sup> and 0-90 t ha<sup>-1</sup>. We also used  
214 Kruskal-Wallis to test the effect of time on differential abundances within the wood ash  
215 concentrations separately. P-values were adjusted for false discovery rate (FDR) using the  
216 Benjamini–Hochberg method in all tests. NMDS on Bray Curtis dissimilarities of gene  
217 compositions and *Adonis* testing were carried out as described above. Gene counts  
218 between samples were normalized using the DESeq2 algorithm (Love *et al.*, 2014).  
219 Significantly differentially expressed genes were analysed using the DESeq2 module of  
220 SARTools (Varet *et al.*, 2016). These analyses were conducted by pairwise comparisons  
221 of gene transcription levels between samples of increasing wood ash concentration to  
222 control samples (0t ha<sup>-1</sup>) at different incubation times. For the forest samples at time 100

223 days, only one replicate remained for the 0 t ha<sup>-1</sup> treatment. Therefore we compared  
224 instead the 12 and 90 t ha<sup>-1</sup> to the 3 t ha<sup>-1</sup>.

225 We used linear Pearson regression to test for significant correlations between wood ash  
226 concentration and time against measured physicochemical parameters. Additionally, we  
227 performed two-way ANOVAs with Tukey's post-hoc tests using wood ash concentration  
228 and time as explanatory variables, with all physicochemical parameters as dependent  
229 variables. Variance homogeneity was tested using Levenes's test and normal distribution  
230 of data was tested using the Shapiro-Wilk test in combination with QQ-plots prior to  
231 ANOVA tests.

232 We used a significance level of 0.05, unless otherwise explicitly mentioned, and the results  
233 section provide descriptions at this significance level.

234

### 235 **3. Results**

#### 236 **3.1. Physicochemical parameters**

237 Soil pH, electrical conductivity and DOC correlated positively with wood ash concentration  
238 for both soils (Table 1). For the 90 t ha<sup>-1</sup> ash amendment, soil pH increased from 6.4 to  
239 11.5 in the agricultural and from 4.1 to 8.5 in the forest soil (Supplementary Figure 1).  
240 Similarly, the 90 t ha<sup>-1</sup> resulted in 15 and 19-fold increases in electrical conductivity for the  
241 agricultural and forest soil, respectively. In the agricultural soil, ammonium increased with  
242 time in samples both with and without ash amendment, while nitrate showed no significant  
243 changes. In the forest soil, ammonium and nitrate increased after 3 days in the 90 t ha<sup>-1</sup>  
244 amendment, followed by a decrease after 30 days. In the other treatments, increased  
245 concentrations were observed during the entire incubation period. In both soils,

246 concentrations of dissolved phosphate increased up to 12 t ash ha<sup>-1</sup> followed by a  
247 decrease at 90 t ha<sup>-1</sup>.

248

### 249 **3.2. Quantitative PCR**

250 Prokaryotic abundance (number of 16S rRNA gene copies) increased in the agricultural  
251 soil after the wood ash application of 12 t ha<sup>-1</sup>, but decreased after application of 90 t ha<sup>-1</sup>  
252 (Figure 1). Fungal abundance (number of ITS copies) remained fairly unchanged over  
253 time regardless of ash application with the exception of an increase after 100 days at 90 t  
254 ha<sup>-1</sup>. In the forest soil prokaryotic abundance increased over time for all treatments (Figure  
255 1); however, addition of 12 and 90 t ha<sup>-1</sup> resulted in a stronger increase. The fungal  
256 abundance in the forest soil showed higher abundance for most of the period with wood  
257 ash concentrations of 90 t ha<sup>-1</sup>.

258

### 259 **3.3. rRNA - Community composition**

260 The number of unique rRNA contigs ranged from 1,216 – 5,931 per sample and originated  
261 from all domains of life. Community composition differed significantly ( $p < 0.001$ ;  $R^2 = 0.86$ ;  
262 *Adonis*) between the two soil types. For forest soil, amendment with 90 t ha<sup>-1</sup> resulted in  
263 highly altered community composition (Figure 2) compared to 0-12 t ha<sup>-1</sup>. Though less  
264 pronounced, changes from 0-3-12 t ha<sup>-1</sup> were also clearly visible for both soil types (Figure  
265 2). Moreover, microcosms for particular soil type/ash dose combinations were clearly  
266 separated by sampling times (Figure 2).

267 In both soils, wood ash dose, incubation time, pH and electrical conductivity correlated to  
268 the transformed NMDS community space (Figure 2). Optimized *Adonis* models (Table 2)  
269 supported that wood ash concentration, time, pH, and electrical conductivity together  
270 significantly explained the variation in microbial communities after ash application in both  
271 soils. Additionally, dissolved phosphate significantly explained the variation in microbial  
272 communities in both soils up to 12 t ha<sup>-1</sup> ash amendments and DOC, ammonium and  
273 nitrate in the forest soil.

274

### 275 **3.4. rRNA – Taxonomic distribution and diversity**

276 A majority (85%) of sequence reads, mapped to contigs, could be annotated to order rank  
277 (99% to phylum and 97% to class rank) (Figure 3A). Fewer sequences could be assigned  
278 lower taxonomic ranks (60% and 27% to family and genus level, respectively). Therefore,  
279 we evaluated possible significant differences in abundance of taxa at order level (see  
280 Supplementary Datasheet 3 and 4 for p-values and averages of relative abundances,  
281 respectively). Richness and Shannon diversity decreased in the unamended agricultural  
282 soil over time, while ash amendments of 3 and 12 t ha<sup>-1</sup> counteracted this decrease  
283 (Figure 3B). In the forest soil these measures generally remained unchanged up to 12 t ha<sup>-1</sup>  
284 amendments (with a single exception of increased richness at 3 t ha<sup>-1</sup> after 100 days of  
285 incubation), while the 90 t ha<sup>-1</sup> amendment caused reduction of Shannon diversity.

286

#### 287 **3.4.1. Prokaryotic community**

288 In both soil types, the relative abundance of Chitinophagaceae (Bacteroidetes) increased  
289 with wood ash application (Figure 3A). In the agricultural soil, ash-amendment also caused

290 increases in Alphaproteobacteria and Betaproteobacteria. In the forest soil, the 3 and 12 t  
291 ha<sup>-1</sup> ash-amendments increased Myxococcales (Deltaproteobacteria), while Acidimicrobiia  
292 (Actinobacteria) decreased.

293 In the forest soil, the 90 t ha<sup>-1</sup> ash-amendment resulted in major prokaryotic community  
294 changes. Actinobacteria, Acidobacteria, Armatimonadetes, and Verrucomicrobia  
295 decreased, while Firmicutes, Bacteroidetes and Proteobacteria increased. Firmicutes  
296 dominated after 3 days, with *Paenibacillus* as most abundant with relative abundance of  
297 21.3%, followed by a gradual decrease towards 1.1% after 100 days. Similarly,  
298 Gammaproteobacteria decreased during incubation after an initial increase.  
299 Chitinophagaceae and Rhizobiales (Alphaproteobacteria) showed the opposite temporal  
300 trend and were most abundant after 100 days.

301

### 302 **3.4.2. Fungal community**

303 The 3 and 12 t ha<sup>-1</sup> ash amendments did not affect fungal community composition in the  
304 agricultural soil (Figure 3A). In the forest soil no major changes were found at low  
305 amendments, while application of 90 t ha<sup>-1</sup> resulted in increase in *Mortierella*, Hypocreales  
306 (Sordariomycetes) and *Peziza* (Pezizomycetes).

307

### 308 **3.4.3. Micro-eukaryotic community**

309 In the agricultural soil, the relative abundances of Tubulinea (Amoebozoa),  
310 Thaumatomonadida (Cercozoa) and Silicofilosea (Cercozoa) increased over time in all  
311 treatments (Figure 3A). In the forest soil, *Colpoda* (Ciliophora) increased with time in all

312 treatments, though more pronounced at higher wood ash amendments. Further, Tubulinea  
313 (Amoebozoa), Heteromitidae (Cercozoa) and Silicofilosea (Cercozoa) increased in the 12  
314 and 90 t ha<sup>-1</sup> amendments.

315

### 316 **3.5. mRNA - Functional genes**

317 A total of 0.9 million sequences were mapped to 463 mRNA contigs (Supplementary  
318 Figure 2 and Supplementary Datasheet 2). The two soils possessed distinct pools of  
319 expressed genes ( $p < 0.001$ ;  $R^2 = 0.82$ ; *Adonis*). Overall, Bray-Curtis dissimilarities, based  
320 on mRNA profiles, and fitting of physicochemical parameters to these, revealed similar  
321 trends as for rRNA taxonomic communities (Figure 2 and Table 2).

322 In the agricultural soil, we observed only minor functional gene responses to time and ash-  
323 amendment, while more genes were differentially expressed in the forest soil, especially at  
324 the 90 t ha<sup>-1</sup> amendment (Figure 4; full list of differential expressed genes in  
325 Supplementary Datasheet 5). Of the well characterized genes, four functional categories  
326 contained most of the differentially expressed genes; i.e. “Post-translation modification,  
327 protein turnover, and chaperones”, “Transcription”, “Replication, recombination and repair”  
328 and “Carbohydrate transport and metabolism”. Furthermore, genes related to stress  
329 responses increased mainly in the forest soil at 90 t ha<sup>-1</sup> ash amendments (Supplementary  
330 Figure 3).

331

332

333

## 334 **4. Discussion**

335 Here, we present the first detailed analysis of changes in soil microbial prokaryotic and  
336 eukaryotic communities after amendment with ash using the Total RNA-sequencing  
337 procedure.

338

#### 339 **4.1. Bacterial responses to wood ash application**

340 The general copiotrophic groups of bacteria, i.e. Bacteroidetes, Alphaproteobacteria and  
341 Betaproteobacteria were stimulated by wood ash application. Members of Bacteroidetes  
342 benefit from wood ash application (Noyce *et al.*, 2016; Bang-Andreasen *et al.*, 2017); they  
343 are initial metabolizers of labile carbon and respond positively to increased soil pH and  
344 electrical conductivity (Fierer *et al.*, 2007; Lauber *et al.*, 2009; Kim *et al.*, 2016). Alpha- and  
345 Betaproteobacteria are also generally copiotrophic (Fierer *et al.*, 2007; Cleveland *et al.*,  
346 2007); Betaproteobacteria thrive in soils with higher pH (Kim *et al.*, 2016), whereas  
347 Alphaproteobacteria are favoured at high N availability (Nemergut *et al.*, 2010; Fierer *et al.*,  
348 2012).

349 Acidobacteria and Verrucomicrobia declined after the 90 t ha<sup>-1</sup> amendment to the forest  
350 soil. These phyla are considered oligotrophic (Fierer *et al.*, 2007; Bergmann *et al.*, 2011;  
351 Ramirez *et al.*, 2012; Cederlund *et al.*, 2014; Kielak *et al.*, 2016) and Acidobacteria are  
352 generally most abundant under acidic conditions (Rousk *et al.*, 2010; Kielak *et al.*, 2016).  
353 Thus, increases in pH, bioavailable DOC and nutrients induced by wood-ash allow  
354 copiotrophic groups to thrive on the expense of oligotrophic groups. The shift towards a  
355 more copiotrophic dominated community after ash amendment was further supported by  
356 the mRNA profile of the soil. Here, an increasing number of functional genes involved in



357 metabolism and cell growth (“Translation”, “Transcription” and “Replication”) showed  
358 significant higher transcription levels.

359 Of the Bacteroidetes, Chitinophagaceae showed the strongest positive response to  
360 wood ash application. Members of this family can degrade a broad spectrum of carbon  
361 compounds (Kämpfer *et al.*, 2006; Hanada *et al.*, 2014). Thus, they are well suited for the  
362 ash-induced increased DOC availability. Rhizobiales dominated the increasing  
363 Alphaproteobacterial fraction of the forest soil after ash amendment. They are copiotrophs  
364 (Starke *et al.*, 2016; Lladó & Baldrian, 2017) and can degrade organic pollutants and cope  
365 with heavy metals (Teng *et al.*, 2015). Probably advantageous properties, as the wood ash  
366 induces increase of heavy metals and nutrients in the soils. Deltaproteobacterial  
367 Myxococcales responded positively to wood ash amendment in the forest soil. Noteworthy,  
368 the increase in Myxococcales occurred late in the incubation where especially  
369 Chitinophagaceae and Alphaproteobacteria decreased. Myxococcales are ‘micropredators’  
370 and attack and lyse other bacteria which might explain the increased dominance of this  
371 group on the expense of other bacterial groups (Reichenbach, 1999).

372 The increase in 16S rRNA gene copy numbers after ash amendment (up to 12 t ha<sup>-1</sup> and  
373 90 t ha<sup>-1</sup> for the agricultural and forest soil, respectively) is consistent with other reports of  
374 increasing bacterial numbers after wood ash application (Bååth & Arnebrant, 1994; Fritze  
375 *et al.*, 2000; Perkiömäki & Fritze, 2002; Bang-Andreasen *et al.*, 2017; Vestergård *et al.*,  
376 2018). The large increase in the forest soil is further consistent with the increased pH as  
377 most bacteria thrive better at pH around 7 (Rousk *et al.*, 2009). Prokaryotic growth as well  
378 as a change towards a more copiotrophic community with higher average 16S rRNA gene  
379 number per genome is likely causing the 16S rRNA gene copy increase (Klappenbach *et*  
380 *al.*, 2000; Roller *et al.*, 2016).

381 The 90 t ha<sup>-1</sup> ash amendment to the forest soil caused immediate dominance of Firmicutes  
382 and Gammaproteobacteria. Both groups are copiotrophs that thrives upon addition of  
383 easily degradable carbon and nitrogen to soil which probably partly explain their success  
384 upon ash application (Fierer *et al.*, 2007; Cleveland *et al.*, 2007; Nemergut *et al.*, 2010;  
385 Ramirez *et al.*, 2012; Fierer *et al.*, 2012). However, bacteria from these phyla are also  
386 known to be tolerant to heavy metals (Jacquiod *et al.*, 2017). Moreover, within Firmicutes  
387 the endospore-forming genus *Paenibacillus* dominated (de Hoon *et al.*, 2010), and we  
388 found increased transcription of genes involved in sporulation in these samples.  
389 Combined, these capabilities probably enable members of these groups to withstand the  
390 initial wood ash induced changes to the soil, including increased heavy metal  
391 concentrations, thereby allowing them to be initial utilizers of newly available labile  
392 resources. Reduced diversity at this ash dose further indicates that less organisms can  
393 cope with the ash induced changes to the soil system

394

#### 395 **4.2. Fungal responses to wood ash application**

396 In both soil types, fungal response to ash amendment was slight compared to the  
397 prokaryotic response. Likewise, Cruz-Paredes *et al.* (2017), Högberg *et al.* (2007) and  
398 Rousk *et al.*, (2009, 2011) found bacteria to be more stimulated by nutrient addition and  
399 increases in pH than fungi. Similarly effects of ash amendment have been reported by  
400 Noyce *et al.* (2016) and Mahmood *et al.* (2003). The 90 t ha<sup>-1</sup> amendment in the forest soil  
401 caused increased ITS gene copy numbers and a fungal community shift with increased  
402 dominance of *Mortierella*, *Peziza* and Hypocreales. These fungi are opportunistic  
403 saprotrophs with high growth rates and can exploit readily available nutrients before other

404 fungi arrive (Carlile *et al.*, 2001; Tedersoo *et al.*, 2006; Druzhinina *et al.*, 2012). Further,  
405 some *Peziza* spp. are early post-fire colonizers adapted to ash conditions (Egger, 1986;  
406 Rincón *et al.*, 2014). The increase in these groups further supports that copiotrophic-like  
407 lifestyles are favoured by wood ash application.

408

### 409 **4.3. Micro-eukaryote responses to wood ash application**

410 The micro-eukaryotes also responded to wood ash application in the forest soil, probably  
411 because the stimulation of copiotrophic bacteria and fungi provided more food for  
412 nematodes and protozoa (Rønn *et al.*, 2012). Ciliates (*Colpoda*), amoebae (Tubulinea)  
413 and small heterotrophic flagellates (Heteromitidae and Silicofilosea) increased with more  
414 pronounced responses at the later incubation times. Protozoa generally have longer  
415 generation times than prokaryotes, and thus need longer time to increase in population  
416 size. Further, they cannot start growth before a reasonable bacterial population has been  
417 formed (Fenchel, 1987; Ekelund *et al.*, 2002). The protozoan increase may explain the  
418 small decrease in prokaryotic 16S rRNA gene copies at day 100, where we observed the  
419 largest fraction of protozoa. The positively responding protozoa were likely primarily  
420 bacterivorous (Ekelund & Rønn, 1994; Ekelund, 1998), consistent with the decreasing  
421 relative fraction of bacterial rRNA sequences and the increasing relative fraction of fungal  
422 and protozoan rRNA sequences in the later incubation times after the application of 12 and  
423 90 t ha<sup>-1</sup> ash. Thus, preferential protozoan grazing on bacteria can explain the relative  
424 larger rRNA-fraction of fungi and protozoa at day 100. We found no significant effect of  
425 ash-amendment on micro-eukaryotes in the agricultural soil, which is consistent with the  
426 relative minor effects on prokaryotes and fungi in this soil.

427

#### 428 **4.5. Stress responses at high wood ash amendments**

429 We recorded increased transcription of stress-response genes at the 90 t ha<sup>-1</sup>  
430 amendments, which supports that this high dose exerts harmful effects on many members  
431 of the micro-biome. For example, chaperones ensure correct folding of proteins and are  
432 involved in cellular coping with stress-induced denaturation of proteins (Feder & Hofmann,  
433 1999) and the increase in transcription level of these probably is a stress response. Also,  
434 transmembrane transporter proteins balance osmotic pressure of cells, regulate cytosolic  
435 pH and can export toxins such as metals from the cell (Alberts *et al.*, 2002; Ma *et al.*, 2009;  
436 Wilkens, 2015). Increased activity of transmembrane transporters is probably a response  
437 to wood ash induced osmotic changes to the soil system, increased pH, metal  
438 concentration and other toxic compounds.

439

#### 440 **4.6. The changes in the microbial communities are linked to physicochemical soil** 441 **parameters**

442 We found that ash-amendment strongly increased soil pH, which is a strong driver of  
443 microbial community composition and functioning (Fierer & Jackson, 2006; Rousk *et al.*,  
444 2010) also after wood ash application (Frostegård *et al.*, 1993; Zimmermann & Frey, 2002;  
445 Högberg *et al.*, 2007; Peltoniemi *et al.*, 2016; Bang-Andreasen *et al.*, 2017). DOC and  
446 phosphate concomitantly increased. Several factors may contribute to this: (I) pH  
447 dependent changes in solubility (Evans *et al.*, 2012; Maresca *et al.*, 2017), (II) release from  
448 dead organisms incapable of coping with the wood ash or wood ash induced changes to  
449 the soil system, (III) increased mineralization rates after wood ash application (Bååth &

450 Arnebrant, 1994; Vestergård *et al.*, 2018) and (IV) the phosphorous in the bio-ash (Pitman,  
451 2006; Maresca *et al.*, 2017).

452 Since pH, conductivity, DOC and phosphate all correlated positively to wood ash  
453 concentrations it is difficult to disentangle the direct effect of these components as they  
454 might all be covariates of the wood ash amendments. pH-changes induce a cascade of  
455 effects in soil parameters and therefore affect mineral nutrient availability, salinity, metal  
456 solubility and organic C (Lauber *et al.*, 2009). Many of the wood ash induced changes  
457 were likely caused directly or indirectly by the pH increase, which is probably the major  
458 reason that pH is an essential driver of taxonomic and functional soil characteristics  
459 (Lauber *et al.*, 2009; Rousk *et al.*, 2010; Fierer, 2017; Vestergård *et al.*, 2018).

460 Wood ash contains virtually no nitrogen, hence measurable effects on soil nitrate and  
461 ammonium are probably caused by pH effects on microbial N mineralization (Vestergård *et*  
462 *al.*, 2018) and ion solubility (Pitman, 2006). Changes in nitrate and ammonium were  
463 significant as explanatory variables on the observed rRNA and mRNA dissimilarity profiles  
464 of the forest soil but not in the agricultural soil. Forest soil is generally more N limited than  
465 agricultural soil, where N is kept at a high level through fertilization.

466

#### 467 **4.7. Conclusions**

468 We used detailed total RNA-Sequencing to demonstrate drastic taxonomic and functional  
469 changes in the active prokaryotic and eukaryotic micro-biomes of agricultural and forest  
470 soil after wood ash amendment. Our analyses suggested that increase in pH, electrical  
471 conductivity, dissolved organic carbon and phosphate were the main drivers of the  
472 observed changes. Wood ash amendment of 3 and 12 t ha<sup>-1</sup> resulted in increased

473 prokaryotic abundance and dominance of copiotrophic groups and elevated expression of  
474 genes involved in metabolism and cell growth. Amendment of 90 t ha<sup>-1</sup> caused collapse of  
475 the micro-biome in the agricultural soil, while in the forest the copiotrophic micro-biome,  
476 also including fast-growing saprotrophic fungi, was further stimulated. However, diversity  
477 was reduced, and expression of stress response genes increased. Bacterivorous  
478 protozoan groups increased as a response to enhanced bacterial growth, which supports  
479 that the protozoa have a pivotal role in controlling bacterial abundance in soil following  
480 wood ash application. Overall, prokaryotic community and quantity responded more  
481 pronounced to wood ash amendment than fungi in both forest and agricultural soil.

482

#### 483 **Conflict of Interest**

484 The authors declare no conflict of interest.

485

#### 486 **Funding**

487 This work was supported by the “Center for Bioenergy Recycling (ASHBACK)” project,  
488 funded by the Danish Council for Strategic Research (grant no 0603-00587B) and Danish  
489 Geocenter (grant no 5298507). AL was supported by a Juan de la Cierva scholarship from  
490 the Spanish Government. MZA was supported by the European Union’s Horizon 2020  
491 research and innovation programme under the Marie Skłodowska-Curie project  
492 MicroArctic (grant no 675546). FE was supported by the Danish Council for Independent  
493 Research (DFF-4002-00274).

494

495 **Acknowledgment**

496 We thank Pia Bach Jakobsen for laboratory assistance.

## 497 **References**

- 498 Alberts B, Johnson A, Lewis J, Raff M, Roberts K, Walter P. (2002). *Molecular Biology of the Cell*.  
499 4th ed. Garland Science: New York.
- 500 Aronsson KA, Ekelund NGA. (2004). Biological effects of wood ash application to forest and  
501 aquatic ecosystems. *J Environ Qual* **33**:1595–1605.
- 502 Augusto L, Bakker MR, Meredieu C. (2008). Wood ash applications to temperate forest  
503 ecosystems—potential benefits and drawbacks. *Plant Soil* **306**:181–198.
- 504 Bang-Andreasen T, Nielsen JT, Voriskova J, Heise J, Rønn R, Kjøller R, *et al.* (2017). Wood ash  
505 induced pH changes strongly affect soil bacterial numbers and community composition. *Front*  
506 *Microbiol* **8**:1400.
- 507 Bergmann GT, Bates ST, Eilers KG, Lauber CL, Caporaso JG, Walters WA, *et al.* (2011). The  
508 under-recognized dominance of Verrucomicrobia in soil bacterial communities. *Soil Biol Biochem*  
509 **43**:1450–1455.
- 510 Blagodatskaya E, Kuzyakov Y. (2013). Active microorganisms in soil: Critical review of estimation  
511 criteria and approaches. *Soil Biology and Biochemistry* **67**:192–211.
- 512 Blattner FR, Plunkett G, Bloch CA, Perna NT, Burland V, Riley M, *et al.* (1997). The complete  
513 genome sequence of *Escherichia coli* K-12. *Science* **277**:1453–1462.
- 514 Bååth E, Arnebrant K. (1994). Growth rate and response of bacterial communities to pH in limed  
515 and ash treated forest soils. *Soil Biology and Biochemistry* **26**:995–1001.
- 516 Carlile MJ, Watkinson SC, Gooday GW. (2001). *The Fungi*. 2nd ed. Academic Press: San Diego,  
517 Calif.
- 518 Carvalhais LC, Dennis PG, Tyson GW, Schenk PM. (2012). Application of metatranscriptomics to  
519 soil environments. *J Microbiol Methods* **91**:246–251.
- 520 Cederlund H, Wessén E, Enwall K, Jones CM, Juhanson J, Pell M, *et al.* (2014). Soil carbon  
521 quality and nitrogen fertilization structure bacterial communities with predictable responses of  
522 major bacterial phyla. *Applied Soil Ecology* **84**:62–68.
- 523 Cleveland CC, Nemergut DR, Schmidt SK, Townsend AR. (2007). Increases in soil respiration  
524 following labile carbon additions linked to rapid shifts in soil microbial community composition.  
525 *Biogeochemistry* **82**:229–240.
- 526 Cookson WR, Osman M, Marschner P, Abaye DA, Clark I, Murphy DV, *et al.* (2007). Controls on  
527 soil nitrogen cycling and microbial community composition across land use and incubation  
528 temperature. *Soil Biology and Biochemistry* **39**:744–756.
- 529 Cruz-Paredes C, Wallander H, Kjøller R, Rousk J. (2017). Using community trait-distributions to  
530 assign microbial responses to pH changes and Cd in forest soils treated with wood ash. *Soil*  
531 *Biology and Biochemistry* **112**:153–164.
- 532 Demeyer A, Voundi Nkana J., Verloo M. (2001). Characteristics of wood ash and influence on soil  
533 properties and nutrient uptake: an overview. *Bioresour Technol* **77**:287–295.
- 534 Druzhinina IS, Shelest E, Kubicek CP. (2012). Novel traits of *Trichoderma* predicted through the  
535 analysis of its secretome. *FEMS Microbiol Lett* **337**:1–9.



- 536 Egger KN. (1986). Substrate Hydrolysis Patterns of Post-Fire Ascomycetes (Pezizales). *Mycologia*  
537 **78**:771.
- 538 Ekelund F. (1998). Enumeration and abundance of mycophagous protozoa in soil, with special  
539 emphasis on heterotrophic flagellates. *Soil Biology and Biochemistry* **30**:1343–1347.
- 540 Ekelund F, Frederiksen HB, Rønn R. (2002). Population dynamics of active and total ciliate  
541 populations in arable soil amended with wheat. *Appl Environ Microbiol* **68**:1096–1101.
- 542 Ekelund F, Rønn R. (1994). Notes on protozoa in agricultural soil with emphasis on heterotrophic  
543 flagellates and naked amoebae and their ecology. *FEMS Microbiol Rev* **15**:321–353.
- 544 Epelde L, Lanzén A, Blanco F, Urich T, Garbisu C. (2015). Adaptation of soil microbial community  
545 structure and function to chronic metal contamination at an abandoned Pb-Zn mine. *FEMS*  
546 *Microbiol Ecol* **91**:1–11.
- 547 Evans CD, Jones TG, Burden A, Ostle N, Zieliński P, Cooper MDA, *et al.* (2012). Acidity controls  
548 on dissolved organic carbon mobility in organic soils. *Glob Change Biol* **18**:3317–3331.
- 549 Feder ME, Hofmann GE. (1999). Heat-shock proteins, molecular chaperones, and the stress  
550 response: evolutionary and ecological physiology. *Annu Rev Physiol* **61**:243–282.
- 551 Fenchel T. (1987). Ecology of Protozoa. 1st ed. Springer: Berlin, Heidelberg doi:10.1007/978-3-  
552 662-25981-8.
- 553 Fierer N. (2017). Embracing the unknown: disentangling the complexities of the soil microbiome.  
554 *Nat Rev Microbiol* **15**:579–590.
- 555 Fierer N, Bradford MA, Jackson RB. (2007). Toward an ecological classification of soil bacteria.  
556 *Ecology* **88**:1354–1364.
- 557 Fierer N, Jackson RB. (2006). The diversity and biogeography of soil bacterial communities. *Proc*  
558 *Natl Acad Sci U S A* **103**:626–631.
- 559 Fierer N, Lauber CL, Ramirez KS, Zaneveld J, Bradford MA, Knight R. (2012). Comparative  
560 metagenomic, phylogenetic and physiological analyses of soil microbial communities across  
561 nitrogen gradients. *ISME J* **6**:1007–1017.
- 562 Fritze H, Perkiömäki J, Saarela U, Katainen R, Tikka P, Yrjälä K, *et al.* (2000). Effect of Cd-  
563 containing wood ash on the microflora of coniferous forest humus. *FEMS Microbiol Ecol* **32**:43–51.
- 564 Frostegård A, Tunlid A, Bååth E. (1993). Phospholipid Fatty Acid composition, biomass, and  
565 activity of microbial communities from two soil types experimentally exposed to different heavy  
566 metals. *Appl Environ Microbiol* **59**:3605–3617.
- 567 Frostegård Å., Bååth E, Tunlio A. (1993). Shifts in the structure of soil microbial communities in  
568 limed forests as revealed by phospholipid fatty acid analysis. *Soil Biology and Biochemistry*  
569 **25**:723–730.
- 570 Geisen S, Tveit AT, Clark IM, Richter A, Svenning MM, Bonkowski M, *et al.* (2015).  
571 Metatranscriptomic census of active protists in soils. *ISME J* **9**:2178–2190.
- 572 Grabherr MG, Haas BJ, Yassour M, Levin JZ, Thompson DA, Amit I, *et al.* (2011). Full-length  
573 transcriptome assembly from RNA-Seq data without a reference genome. *Nat Biotechnol* **29**:644–  
574 652.

- 575 Hanada S, Tamaki H, Nakamura K, Kamagata Y. (2014). *Crenotalea thermophila* gen. nov., sp.  
576 nov., a member of the family Chitinophagaceae isolated from a hot spring. *Int J Syst Evol Microbiol*  
577 **64**:1359–1364.
- 578 Hansen CHF, Krych L, Nielsen DS, Vogensen FK, Hansen LH, Sørensen SJ, *et al.* (2012). Early  
579 life treatment with vancomycin propagates *Akkermansia muciniphila* and reduces diabetes  
580 incidence in the NOD mouse. *Diabetologia* **55**:2285–2294.
- 581 Hansen M, Bang-Andreasen T, Sørensen H, Ingerslev M. (2017). Micro vertical changes in soil pH  
582 and base cations over time after application of wood ash on forest soil. *Forest Ecology and*  
583 *Management* **406**:274–280.
- 584 De Hoon MJL, Eichenberger P, Vitkup D. (2010). Hierarchical evolution of the bacterial sporulation  
585 network. *Curr Biol* **20**:R735–45.
- 586 Hultman J, Waldrop MP, Mackelprang R, David MM, McFarland J, Blazewicz SJ, *et al.* (2015).  
587 Multi-omics of permafrost, active layer and thermokarst bog soil microbiomes. *Nature* **521**:208–  
588 212.
- 589 Huotari N, Tillman-Sutela E, Moilanen M, Laiho R. (2015). Recycling of ash – For the good of the  
590 environment? *Forest Ecology and Management* **348**:226–240.
- 591 Högberg MN, Högberg P, Myrold DD. (2007). Is microbial community composition in boreal forest  
592 soils determined by pH, C-to-N ratio, the trees, or all three? *Oecologia* **150**:590–601.
- 593 Ihrmark K, Bödeker ITM, Cruz-Martinez K, Friberg H, Kubartova A, Schenck J, *et al.* (2012). New  
594 primers to amplify the fungal ITS2 region--evaluation by 454-sequencing of artificial and natural  
595 communities. *FEMS Microbiol Ecol* **82**:666–677.
- 596 Jacquiod S, Cyriaque V, Riber L, Al-soud WA, Gillan DC, Wattiez R, *et al.* (2017). Long-term  
597 industrial metal contamination unexpectedly shaped diversity and activity response of sediment  
598 microbiome. *J Hazard Mater* **344**:299–307.
- 599 Jensen LJ, Julien P, Kuhn M, von Mering C, Muller J, Doerks T, *et al.* (2008). eggNOG: automated  
600 construction and annotation of orthologous groups of genes. *Nucleic Acids Res* **36**:D250–4.
- 601 Karlton E, Saarsalmi A, Ingerslev M, Mandre M, Andersson S, Gaitnieks T, *et al.* (2008). Wood ash  
602 recycling – possibilities and risks. In: *Sustainable use of forest biomass for energy*, Röser, D,  
603 Asikainen, A, Raulund-Rasmussen, K, & Stupak, I (eds), Springer Netherlands: Dordrecht, pp. 79–  
604 108.
- 605 Kielak AM, Barreto CC, Kowalchuk GA, van Veen JA, Kuramae EE. (2016). The Ecology of  
606 Acidobacteria: Moving beyond Genes and Genomes. *Front Microbiol* **7**:744.
- 607 Kim JM, Roh A-S, Choi S-C, Kim E-J, Choi M-T, Ahn B-K, *et al.* (2016). Soil pH and electrical  
608 conductivity are key edaphic factors shaping bacterial communities of greenhouse soils in Korea. *J*  
609 *Microbiol* **54**:838–845.
- 610 Klappenbach JA, Dunbar JM, Schmidt TM. (2000). rRNA operon copy number reflects ecological  
611 strategies of bacteria. *Appl Environ Microbiol* **66**:1328–1333.
- 612 Kopylova E, Noé L, Touzet H. (2012). SortMeRNA: fast and accurate filtering of ribosomal RNAs in  
613 metatranscriptomic data. *Bioinformatics* **28**:3211–3217.

- 614 Kämpfer P, Young C-C, Sridhar KR, Arun AB, Lai WA, Shen FT, *et al.* (2006). Transfer of  
615 [Flexibacter] sancti, [Flexibacter] filiformis, [Flexibacter] japonensis and [Cytophaga] arvensicola to  
616 the genus Chitinophaga and description of Chitinophaga skermanii sp. nov. *Int J Syst Evol*  
617 *Microbiol* **56**:2223–2228.
- 618 Lanzén A, Jørgensen SL, Huson DH, Gorfer M, Grindhaug SH, Jonassen I, *et al.* (2012). CREST--  
619 classification resources for environmental sequence tags. *PLoS ONE* **7**:e49334.
- 620 Lauber CL, Hamady M, Knight R, Fierer N. (2009). Pyrosequencing-based assessment of soil pH  
621 as a predictor of soil bacterial community structure at the continental scale. *Appl Environ Microbiol*  
622 **75**:5111–5120.
- 623 Li H, Durbin R. (2009). Fast and accurate short read alignment with Burrows-Wheeler transform.  
624 *Bioinformatics* **25**:1754–1760.
- 625 Lladó S, Baldrian P. (2017). Community-level physiological profiling analyses show potential to  
626 identify the copiotrophic bacteria present in soil environments. *PLoS ONE* **12**:e0171638.
- 627 Love MI, Huber W, Anders S. (2014). Moderated estimation of fold change and dispersion for  
628 RNA-seq data with DESeq2. *Genome Biol* **15**:550–550.
- 629 Ma Z, Jacobsen FE, Giedroc DP. (2009). Metal Transporters and Metal Sensors: How  
630 Coordination Chemistry Controls Bacterial Metal Homeostasis. *Chem Rev* **109**:4644–4681.
- 631 Mahmood S, Finlay RD, Fransson A-M, Wallander H. (2003). Effects of hardened wood ash on  
632 microbial activity, plant growth and nutrient uptake by ectomycorrhizal spruce seedlings. *FEMS*  
633 *Microbiol Ecol* **43**:121–131.
- 634 Maresca A, Hyks J, Astrup TF. (2017). Recirculation of biomass ashes onto forest soils: ash  
635 composition, mineralogy and leaching properties. *Waste Manag* **70**:127–138.
- 636 Martin M. (2011). Cutadapt removes adapter sequences from high-throughput sequencing reads.  
637 *EMBnet.journal* **17**:10.
- 638 Miller CS, Baker BJ, Thomas BC, Singer SW, Banfield JF. (2011). EMIRGE: reconstruction of full-  
639 length ribosomal genes from microbial community short read sequencing data. *Genome Biol*  
640 **12**:R44.
- 641 Nawrocki EP, Burge SW, Bateman A, Daub J, Eberhardt RY, Eddy SR, *et al.* (2015). Rfam 12.0:  
642 updates to the RNA families database. *Nucleic Acids Res* **43**:D130–7.
- 643 Nemergut DR, Cleveland CC, Wieder WR, Washenberger CL, Townsend AR. (2010). Plot-scale  
644 manipulations of organic matter inputs to soils correlate with shifts in microbial community  
645 composition in a lowland tropical rain forest. *Soil Biology and Biochemistry* **42**:2153–2160.
- 646 Noyce GL, Fulthorpe R, Gorgolewski A, Hazlett P, Tran H, Basiliko N. (2016). Soil microbial  
647 responses to wood ash addition and forest fire in managed Ontario forests. *Applied Soil Ecology*  
648 **107**:368–380.
- 649 Ohno T, Susan Erich M. (1990). Effect of wood ash application on soil pH and soil test nutrient  
650 levels. *Agriculture, Ecosystems & Environment* **32**:223–239.
- 651 Oksanen J, Kindt R, Legendre P, O'Hara B, Simpson GL, Solymos P, *et al.* (2008). vegan:  
652 Community Ecology Package. <https://cran.r-project.org/web/packages/vegan/>.

- 653 Peltoniemi K, Pyrhönen M, Laiho R, Moilanen M, Fritze H. (2016). Microbial communities after  
654 wood ash fertilization in a boreal drained peatland forest. *European journal of soil biology* **76**:95–  
655 102.
- 656 Perkiömäki J, Fritze H. (2002). Short and long-term effects of wood ash on the boreal forest humus  
657 microbial community. *Soil Biology and Biochemistry* **34**:1343–1353.
- 658 Pitman RM. (2006). Wood ash use in forestry - a review of the environmental impacts. *Forestry*  
659 **79**:563–588.
- 660 Qin J, Hovmand MF, Ekelund F, Rønn R, Christensen S, Groot GA de, *et al.* (2017). Wood ash  
661 application increases pH but does not harm the soil mesofauna. *Environ Pollut* **224**:581–589.
- 662 R Core Team. (2015). R: A language and environment for statistical computing. [http://www.R-](http://www.R-project.org/)  
663 [project.org/](http://www.R-project.org/).
- 664 Ramirez KS, Craine JM, Fierer N. (2012). Consistent effects of nitrogen amendments on soil  
665 microbial communities and processes across biomes. *Glob Change Biol* **18**:1918–1927.
- 666 Reichenbach H. (1999). The ecology of the myxobacteria. *Environ Microbiol* **1**:15–21.
- 667 Rice P, Longden I, Bleasby A. (2000). EMBOSS: the european molecular biology open software  
668 suite. *Trends Genet* **16**:276–277.
- 669 Rincón A, Santamaría BP, Ocaña L, Verdú M. (2014). Structure and phylogenetic diversity of post-  
670 fire ectomycorrhizal communities of maritime pine. *Mycorrhiza* **24**:131–141.
- 671 Roller BRK, Stoddard SF, Schmidt TM. (2016). Exploiting rRNA operon copy number to investigate  
672 bacterial reproductive strategies. *Nature microbiology* **1**:16160.
- 673 Rousk J, Brookes PC, Bååth E. (2009). Contrasting soil pH effects on fungal and bacterial growth  
674 suggest functional redundancy in carbon mineralization. *Appl Environ Microbiol* **75**:1589–1596.
- 675 Rousk J, Brookes PC, Bååth E. (2011). Fungal and bacterial growth responses to N fertilization  
676 and pH in the 150-year “Park Grass” UK grassland experiment. *FEMS Microbiol Ecol* **76**:89–99.
- 677 Rousk J, Bååth E, Brookes PC, Lauber CL, Lozupone C, Caporaso JG, *et al.* (2010). Soil bacterial  
678 and fungal communities across a pH gradient in an arable soil. *ISME J* **4**:1340–1351.
- 679 Rønn R, Vestergård M, Ekelund F. (2012). Interactions Between Bacteria, Protozoa and  
680 Nematodes in Soil. *Acta Protozoologica* **51**:223–235.
- 681 Schostag M, Priemé A, Jacquiod R, Russel J, Ekelund F, Jacobsen CS. (2019). Bacterial and  
682 protozoan dynamics upon thawing and freezing of an active layer permafrost soil. *ISME J*  
683 doi:10.1038/s41396-019-0351-x.
- 684 Starke R, Kermer R, Ullmann-Zeunert L, Baldwin IT, Seifert J, Bastida F, *et al.* (2016). Bacteria  
685 dominate the short-term assimilation of plant-derived N in soil. *Soil Biology and Biochemistry*  
686 **96**:30–38.
- 687 Tedersoo L, Hansen K, Perry BA, Kjølner R. (2006). Molecular and morphological diversity of  
688 pezizalean ectomycorrhiza. *New Phytol* **170**:581–596.
- 689 Teng Y, Wang X, Li L, Li Z, Luo Y. (2015). Rhizobia and their bio-partners as novel drivers for  
690 functional remediation in contaminated soils. *Front Plant Sci* **6**:32.

- 691 Urich T, Lanzén A, Qi J, Huson DH, Schleper C, Schuster SC. (2008). Simultaneous assessment  
692 of soil microbial community structure and function through analysis of the meta-transcriptome.  
693 *PLoS ONE* **3**:e2527.
- 694 Vance ED. (1996). Land Application of Wood-Fired and Combination Boiler Ashes: An Overview.  
695 *Journal of Environment Quality* **25**:937.
- 696 Varet H, Brillet-Guéguen L, Coppée J-Y, Dillies M-A. (2016). SARTools: A DESeq2- and EdgeR-  
697 Based R Pipeline for Comprehensive Differential Analysis of RNA-Seq Data. *PLoS ONE*  
698 **11**:e0157022.
- 699 Vaser R, Pavlović D, Šikić M. (2016). SWORD-a highly efficient protein database search.  
700 *Bioinformatics* **32**:i680–i684.
- 701 Vestergård M, Bang-Andreasen T, Buss SM, Cruz-Paredes C, Bentzon-Tilia S, Ekelund F, *et al.*  
702 (2018). The relative importance of the bacterial pathway and soil inorganic nitrogen increase  
703 across an extreme wood-ash application gradient. *Glob Change Biol Bioenergy*.  
704 doi:10.1111/gcbb.12494.
- 705 Wall DH, Bardgett RD, Behan-Pelletier V, Herrick JE, Jones TH, Ritz K, *et al.* (2012). Soil ecology  
706 and ecosystem services. 1st ed. Oxford University Press: USA.
- 707 White T, Bruns R, Lee S, Taylor J. (1990). Amplification and direct sequencing of fungal  
708 ribosomalrna genes for phylogenetics. In: *PCR protocols - a guide to methods and applications*,  
709 Innis, M, Gelfand, D, Sninsky, J, & White, T (eds), Academic Press: New York, US, pp. 315–322.
- 710 Wilke A, Harrison T, Wilkening J, Field D, Glass EM, Kyrpides N, *et al.* (2012). The M5nr: a novel  
711 non-redundant database containing protein sequences and annotations from multiple sources and  
712 associated tools. *BMC Bioinformatics* **13**:141.
- 713 Wilkens S. (2015). Structure and mechanism of ABC transporters. *F1000Prime Rep* **7**:14.
- 714 Zimmermann S, Frey B. (2002). Soil respiration and microbial properties in an acid forest soil:  
715 effects of wood ash. *Soil Biology and Biochemistry* **34**:1727–1737.
- 716
- 717
- 718

## 719 **Figure Legends**

720 **Figure 1:** Numbers of 16S rRNA gene copies (top row) and ITS gene copies (bottom row) per g-1 DW of the  
721 agricultural soil (left panel) and the forest soil (right panel) across wood ash concentrations and incubation  
722 times. Symbols represents averages with SEM (n=3). The presented data are results from qPCR on DNA.  
723 Note logarithmic y-axes and different ranges of values on y-axes.

724 **Figure 2:** NMDS plots based on Bray-Curtis dissimilarities of the taxonomic (rRNA; top row) and functional  
725 (mRNA; bottom row) profiles of an agricultural soil and a forest soil amended with wood-ash. Dashed lines  
726 represent 95% confidence ellipses around samples with same wood ash concentration. Arrows indicate the  
727 direction of fitted physiochemical parameters (using envfit function; only significant parameters shown) onto  
728 the NMDS ordination space (longer arrows indicate better fit). To improve the resolution of the forest soil at  
729 wood ash concentrations 0-12 t ha<sup>-1</sup>, we removed the 90 t ha<sup>-1</sup> samples and repeated the analysis  
730 (rightmost two panels).

731 **Figure 3:** Community composition and diversity across the two soils at increasing wood ash amendment and  
732 incubation times based on PCR-free, total RNA-Seq. (A) The most abundant taxonomic groups (cutoff levels  
733 of average relative abundances are shown in legend header) are presented in upper panel (Overall  
734 taxonomy); i.e. Archaea, Bacteria, Fungi, Protists, and Metazoa. Bars represent averages of triplicates  
735 (excluding agricultural soil 3 t ha<sup>-1</sup> at 100 days (n=2), forest soil 0t ha<sup>-1</sup> at 0 days (n=1) and forest soil 0t ha<sup>-1</sup>  
736 at 100 days (n=1)). (B) Richness and Shannon diversity. Statistically significant different richness and  
737 diversity measures (p < 0.05) between samples within each measure and soil is indicated by different letters.  
738 Symbols represent averages, as described for the bar plots.

739 **Figure 4:** Numbers of differentially expressed genes within functional categories across agricultural and  
740 forest soil by pairwise comparisons of gene transcription levels between samples of increasing wood ash  
741 concentration to reference samples without ash-amendment at different incubation times. "0vs3", "0vs12" and  
742 "0vs90" denote the wood ash doses compared, i.e. wood ash dose 0 t ha<sup>-1</sup> compared to 3 t ha<sup>-1</sup> is written  
743 "0vs3". Increasing and decreasing gene transcription levels are presented above and below the black  
744 horizontal zero-line, respectively. The pairwise comparisons for forest soil, 100 days, were carried out using  
745 3 t ha<sup>-1</sup>, 100 days, as reference samples because only one replicate was acquired from the 0 t ha<sup>-1</sup>, 100  
746 days, samples (hence the empty plot in 0vs3, 100 days, forest plot). Digits above/below bars represent the  
747 number of differentially expressed genes within a gene category.

748 **Supplementary Figure 1:** Metadata results across soil types, wood ash concentrations and incubation time.  
749 Different letters denote significant (p < 0.05) difference between samples within the same plot (Tukey post-  
750 hoc pairwise comparisons). Bars represents averages of triplicates with SEM (n = 3). Bars without errorbars  
751 represents values of 1 replicate. Note different range of y-axis values between the two soils for the same  
752 metadata category.

753 **Supplementary Figure 2:** Functional gene compositions in (A) relative abundance and (B) absolute  
754 abundance (note log<sub>10</sub> y-axis). "Poorly characterized" genes are excluded from the relative abundance plots  
755 to increase resolution of genes with known function. Bars are averages of triplicates with SEM as errorbars  
756 (excluding agricultural soil 3 t ha<sup>-1</sup>, 100 days (n=2) and forest soil 0t ha after 0 (n=1) and 100 days (n=1)).

757 **Supplementary Figure 3:** Functional genes involved in (A) chaperones, (B) sporulation, (C)  
758 Transmembrane transporters and (D) general stress response. The presented functional genes (with unique  
759 COG IDs) are all differentially expressed after wood ash amendment and are presented as relative  
760 abundance of total mRNA profile. Symbols are averages of triplicates with SEM as errorbars (excluding  
761 agricultural soil 3 t ha<sup>-1</sup>, 100 days (n=2) and forest soil 0t ha after 0 (n=1) and 100 days (n=1)).

762

763 **Tables**

764 **Table 1:** Pearson correlation values (r) and associated significance levels between ash dose (field  
765 equivalents 0, 3, 12 and 90 t ha<sup>-1</sup>) and incubation time, and soil physicochemical parameters.

| Explanatory variable                   | Agricultural soil                 |                | Forest soil                       |                |
|----------------------------------------|-----------------------------------|----------------|-----------------------------------|----------------|
|                                        | Ash dose<br>(t ha <sup>-1</sup> ) | Time<br>(days) | Ash dose<br>(t ha <sup>-1</sup> ) | Time<br>(days) |
| pH                                     | 0.76***                           | 0.15           | 0.98***                           | 0.07           |
| Conductivity (µs cm <sup>-1</sup> )    | 0.82***                           | 0.14           | 0.99***                           | 0.07           |
| DOC (mg g <sup>-1</sup> DW soil)       | 0.74***                           | 0.33*          | 0.91***                           | 0.05           |
| Ammonium (µg g <sup>-1</sup> DW soil)  | 0.05                              | 0.57***        | 0.40**                            | 0.36           |
| Nitrate (µg g <sup>-1</sup> DW soil)   | -0.45***                          | 0.28*          | 0.63***                           | -0.15          |
| Phosphate (µg g <sup>-1</sup> DW soil) | -0.61*                            | -0.07          | 0.26                              | -0.04          |

766 \*) p<0.05, \*\*) p<0.01, \*\*\*) p< 0.001.

767

768 **Table 2:** Explanatory strength of physicochemical variables on rRNA and mRNA dissimilarity profiles of the  
769 two soils after ash amendment tested using Permutational Multivariate Analysis Of Variance (*Adonis*)

| Explanatory variable                            | rRNA                                      |                                      |                                      | mRNA                                      |                                      |                                      |
|-------------------------------------------------|-------------------------------------------|--------------------------------------|--------------------------------------|-------------------------------------------|--------------------------------------|--------------------------------------|
|                                                 | Agriculture<br>(0–12 t ha <sup>-1</sup> ) | Forest<br>(0–90 t ha <sup>-1</sup> ) | Forest<br>(0–12 t ha <sup>-1</sup> ) | Agriculture<br>(0–12 t ha <sup>-1</sup> ) | Forest<br>(0–90 t ha <sup>-1</sup> ) | Forest<br>(0–12 t ha <sup>-1</sup> ) |
| pH                                              | 0.184***                                  | 0.536***                             | 0.216***                             | 0.079*                                    | 0.386***                             | 0.224***                             |
| Conductivity (µs cm <sup>-1</sup> )             | 0.081***                                  | 0.056***                             | 0.108***                             | 0.140*                                    | 0.061***                             | 0.100***                             |
| Wood ash concentration (t<br>ha <sup>-1</sup> ) | 0.113***                                  | 0.044***                             | 0.041*                               | 0.063*                                    | 0.049***                             | 0.051**                              |
| Time (days)                                     | 0.089***                                  | 0.068***                             | 0.173***                             | 0.092*                                    | 0.086***                             | 0.258***                             |
| Phosphate (µg g <sup>-1</sup> DW soil)          | 0.039*                                    | -                                    | 0.076***                             | 0.065*                                    | -                                    | 0.118***                             |
| DOC (mg g <sup>-1</sup> DW soil)                | -                                         | 0.094***                             | 0.038*                               | -                                         | 0.162***                             | 0.033**                              |
| Ammonium (µg g <sup>-1</sup> DW<br>soil)        | -                                         | 0.034**                              | 0.029*                               | -                                         | 0.066***                             | 0.040**                              |

|                                         |          |         |        |       |          |         |
|-----------------------------------------|----------|---------|--------|-------|----------|---------|
| Nitrate ( $\mu\text{g g}^{-1}$ DW soil) | -        | 0.027** | 0.036* | -     | 0.038*** | 0.028*  |
| Wood ash concentration:Time             | 0.064*** | 0.015*  | 0.043* | -     | 0.025**  | 0.039** |
| Residuals (unexplained variance)        | 0.430    | 0.127   | 0.239  | 0.560 | 0.126    | 0.109   |

---

770 Values refer to  $R^2$  values of the *Adonis* test on Bray-Curtis dissimilarities between samples.

771 Asterisks refers to significance level (\* is  $0.01 < p < 0.05$ , \*\* is  $0.001 < p < 0.01$ , \*\*\* is  $p < 0.001$ ).

772 Non-significant ( $p > 0.05$ ) parameters are written as “-”.

773



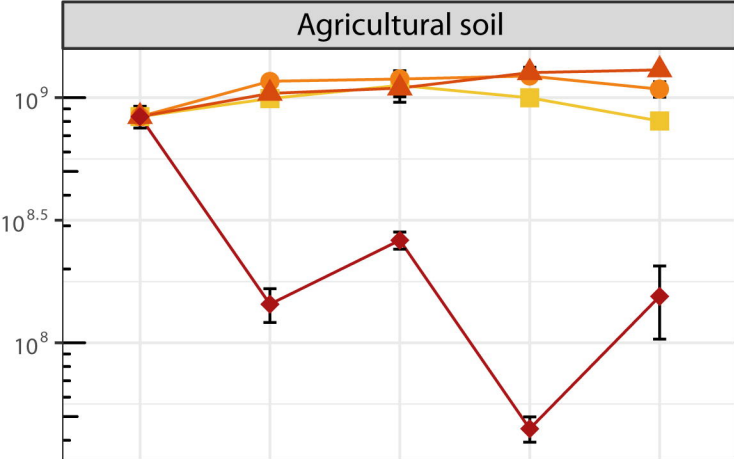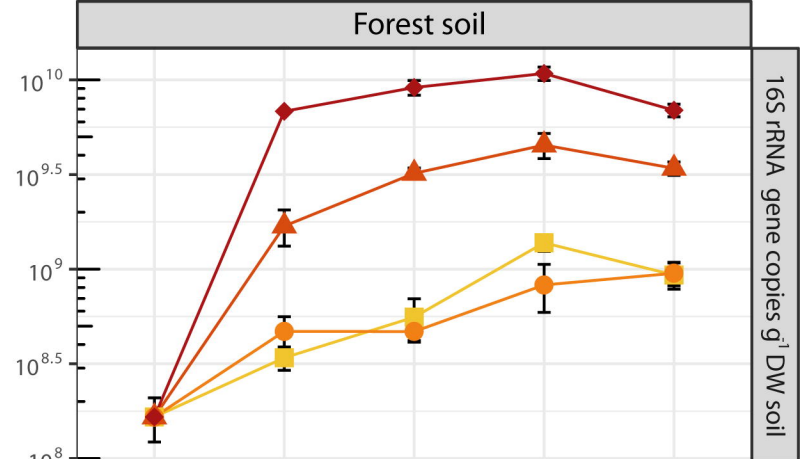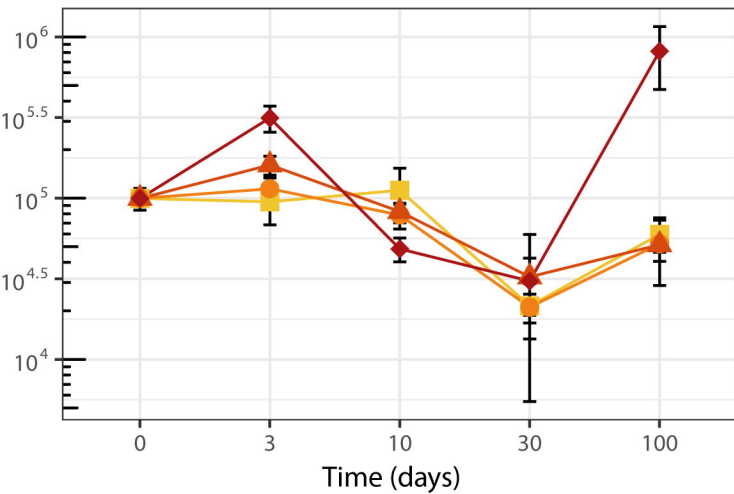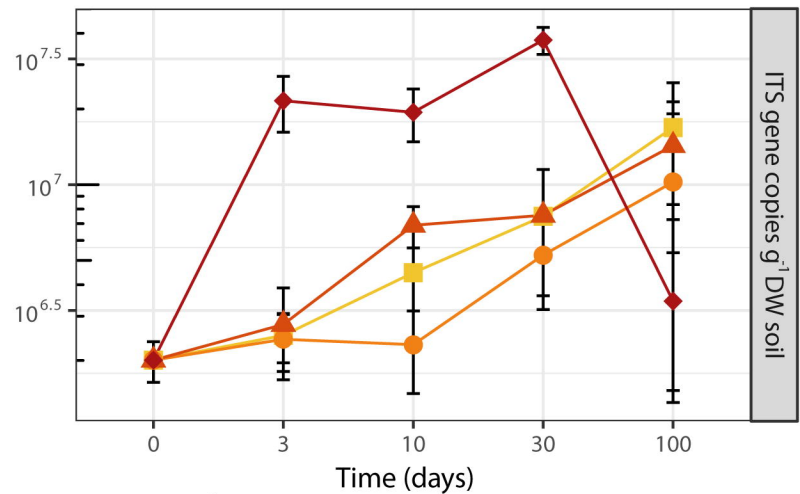

Wood ash concentration ( $t\ ha^{-1}$ )

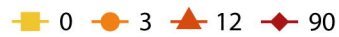

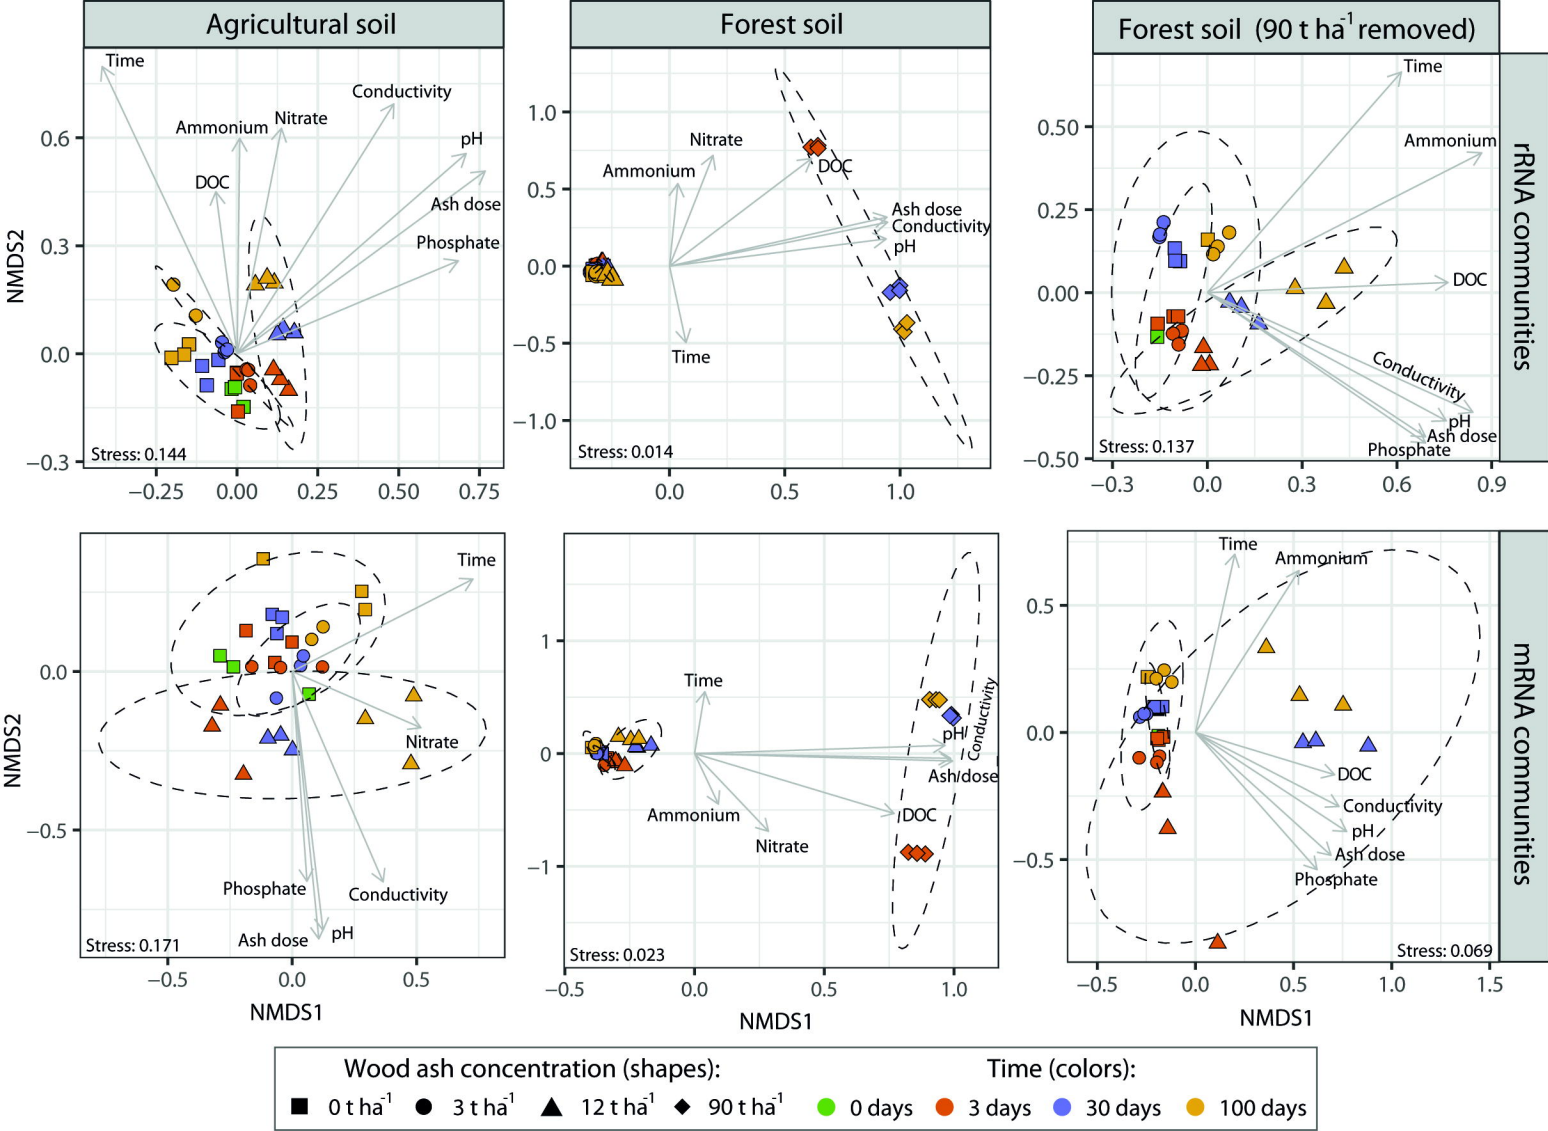

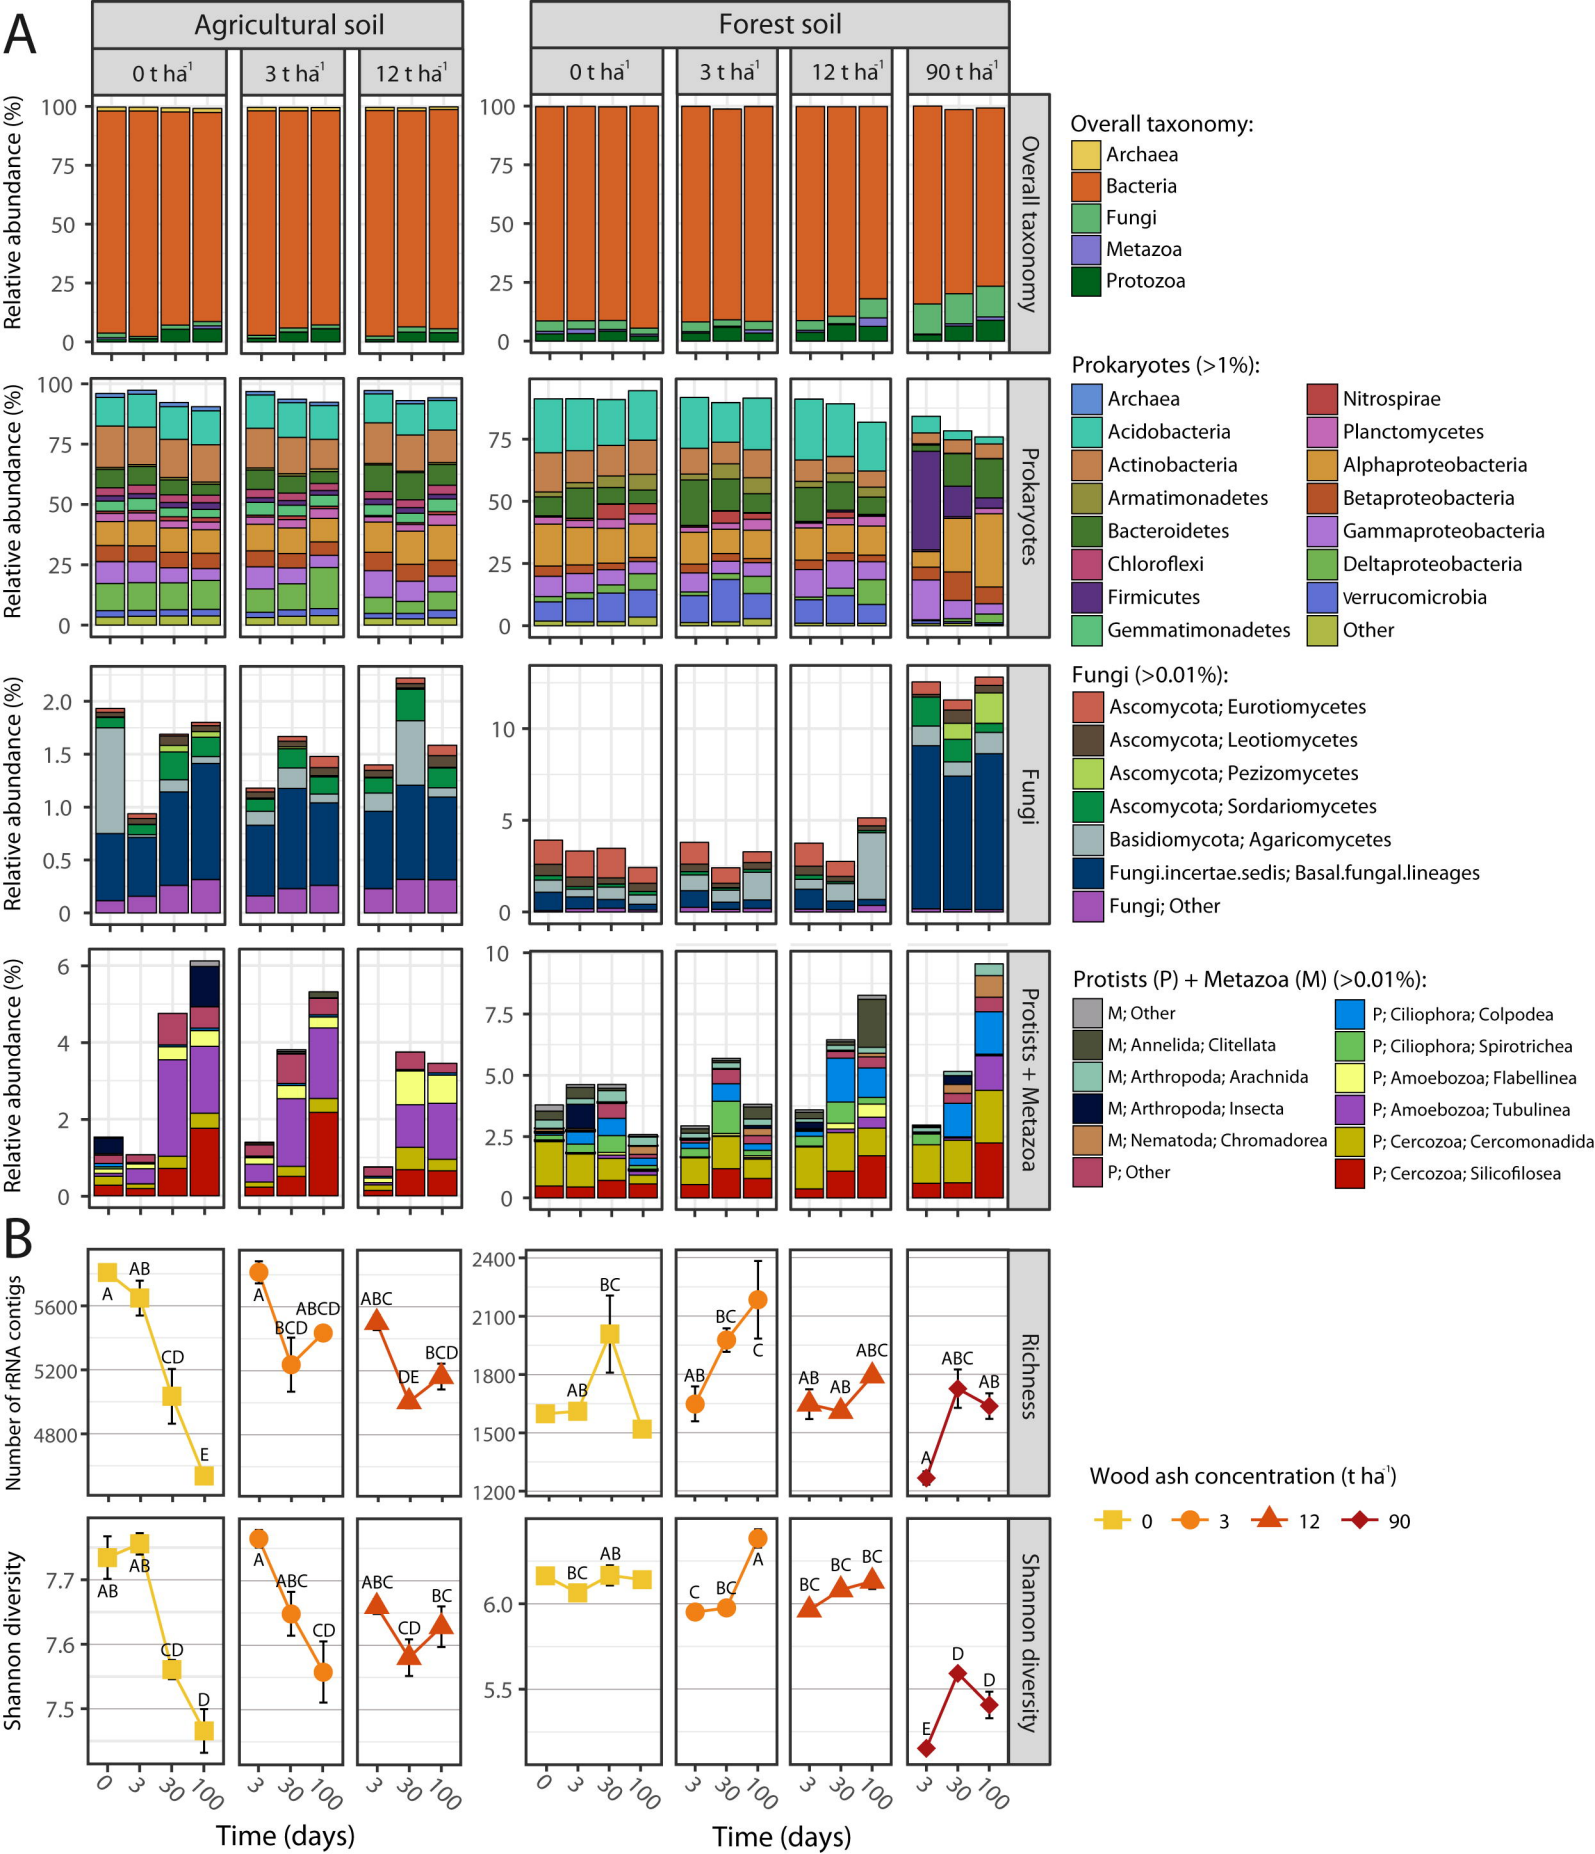

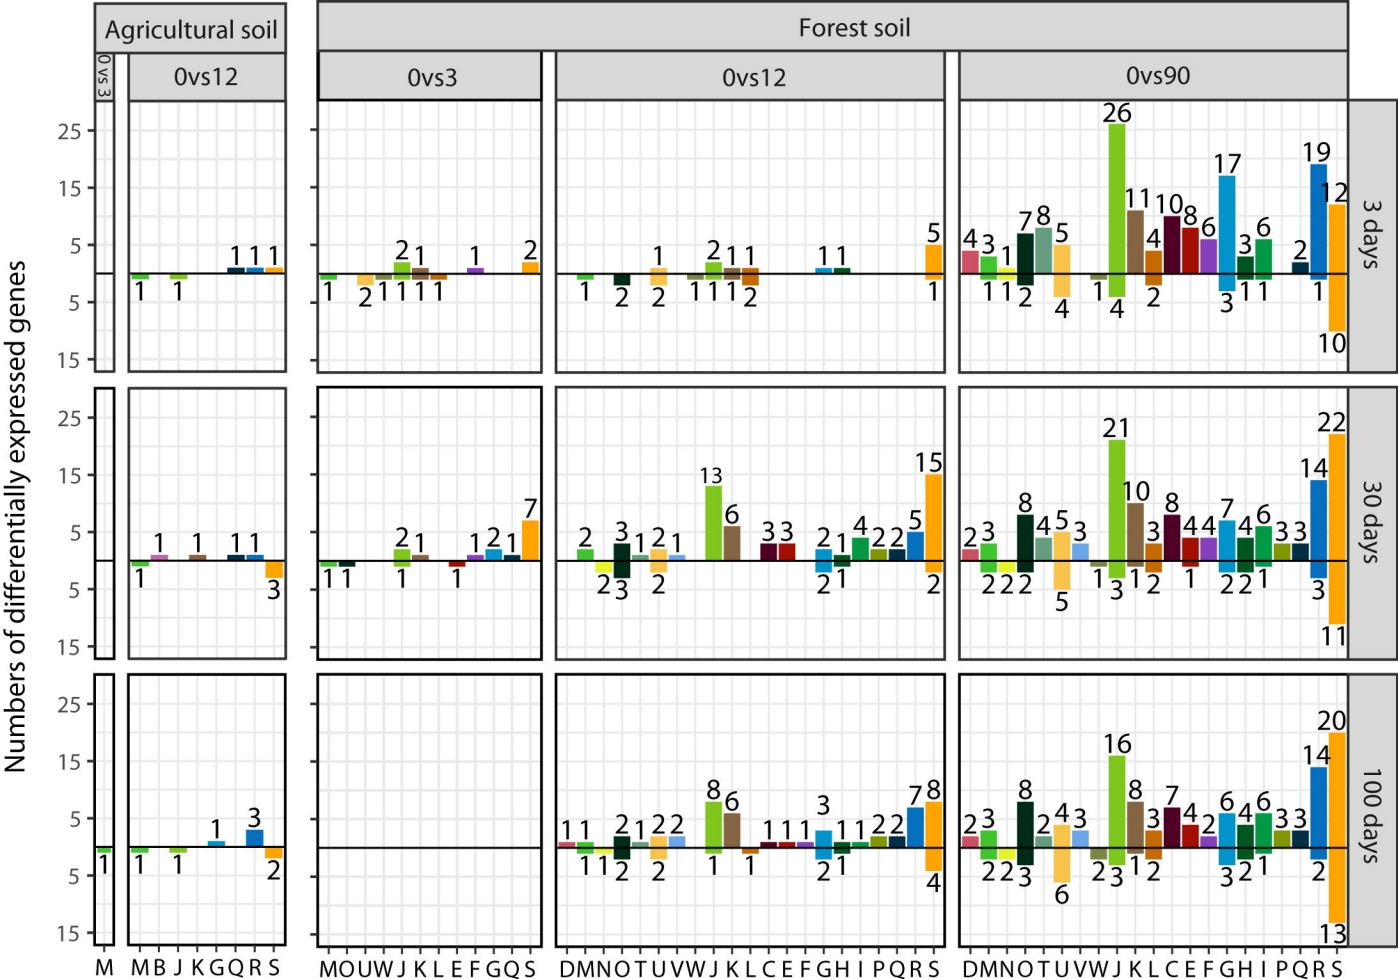

## Gene categories

### Cellular processes and signalling:

- [D] Cell cycle control, cell division, chromosome partitioning
- [M] Cell wall/membrane/envelope biogenesis
- [N] Cell motility
- [O] Post-translational modification, protein turnover, and chaperones
- [T] Signal transduction mechanisms
- [U] Intracellular trafficking, secretion, and vesicular transport
- [V] Defense mechanisms
- [W] Extracellular structures

### Information storage and processing:

- [B] Chromatin structure and dynamics
- [J] Translation, ribosomal structure and biogenesis
- [K] Transcription
- [L] Replication, recombination and repair

### Metabolism:

- [C] Energy production and conversion
- [E] Amino acid transport and metabolism
- [F] Nucleotide transport and metabolism
- [G] Carbohydrate transport and metabolism
- [H] Coenzyme transport and metabolism
- [I] Lipid transport and metabolism
- [P] Inorganic ion transport and metabolism
- [Q] Secondary metabolites biosynthesis, transport, and catabolism

### Poorly characterized:

- [R] General function prediction only
- [S] Function unknown

### Agricultural soil

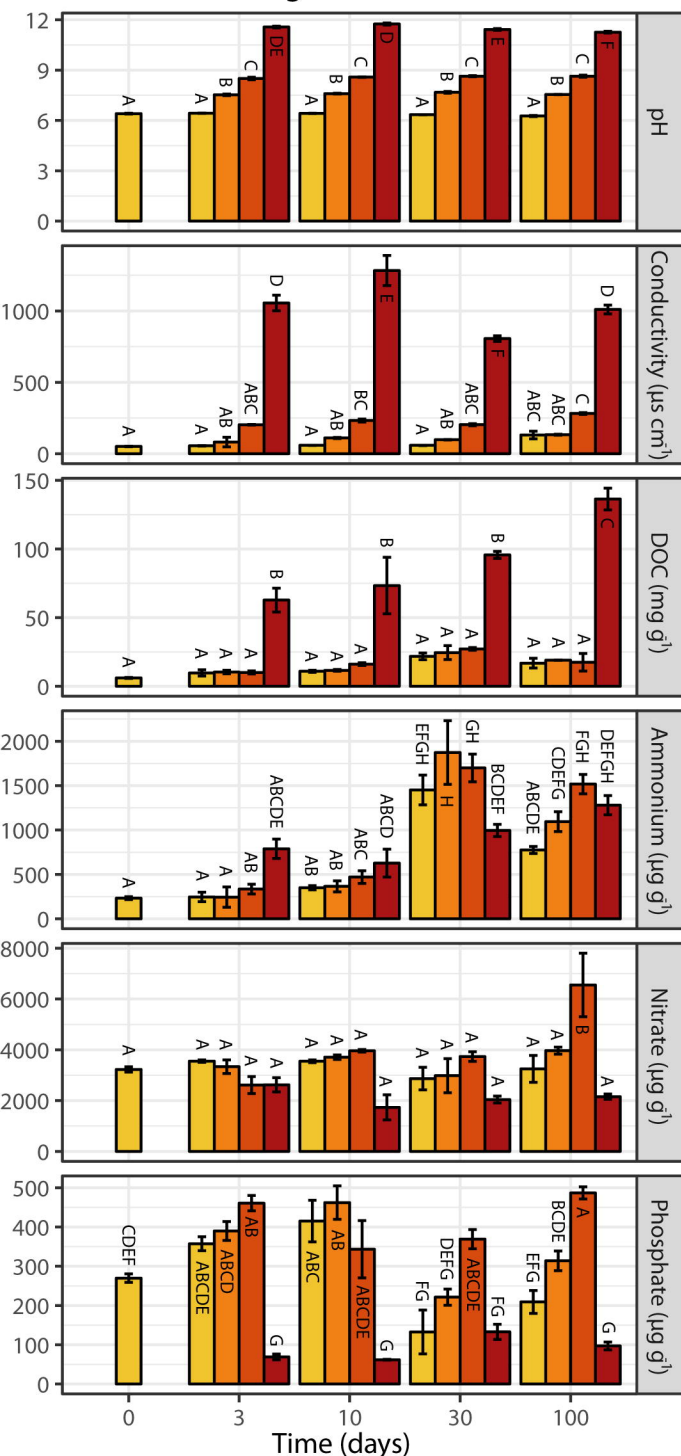

### Forest soil

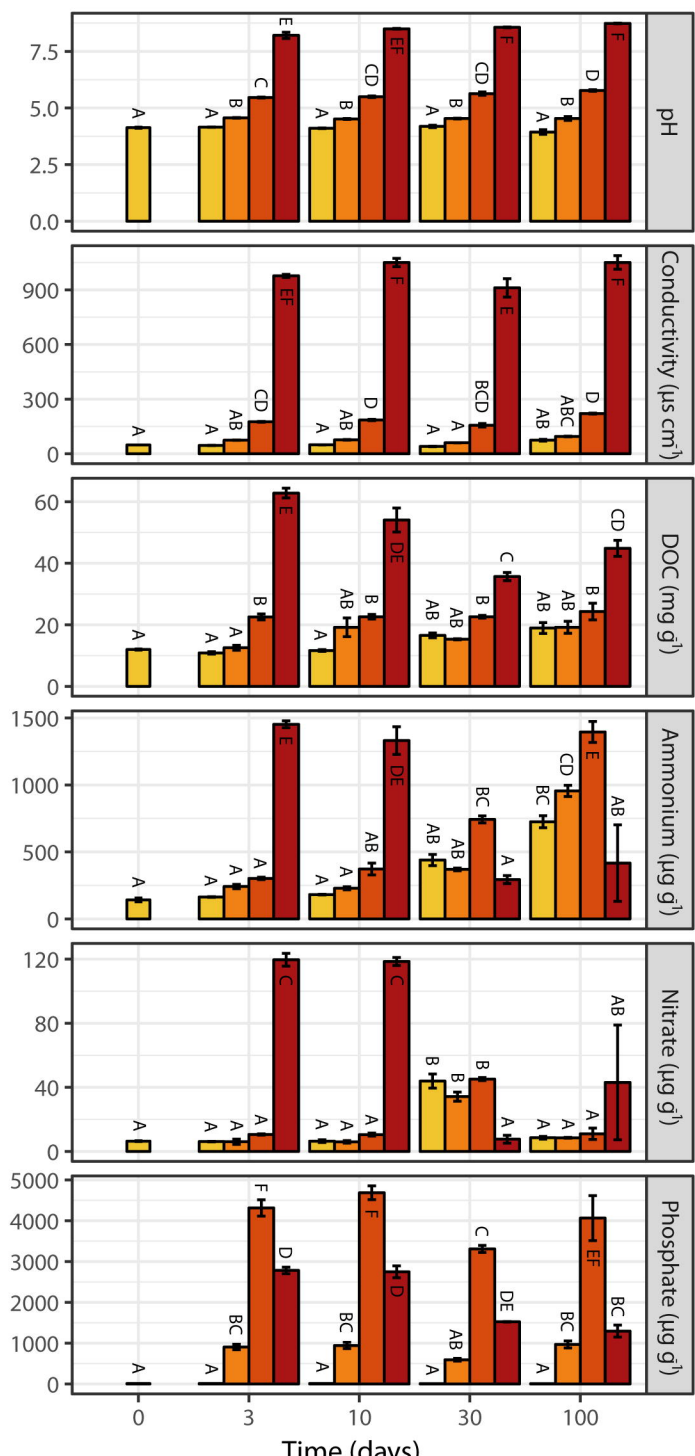

Wood ash concentration (t ha<sup>-1</sup>)

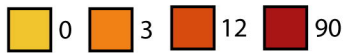

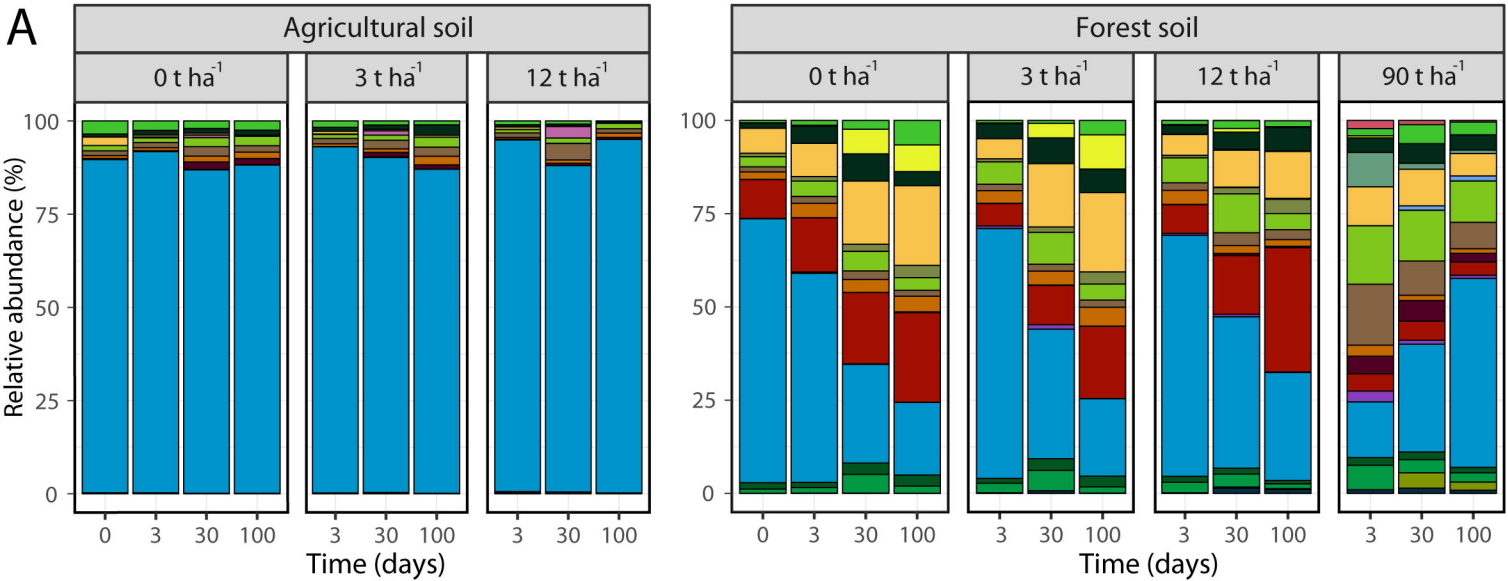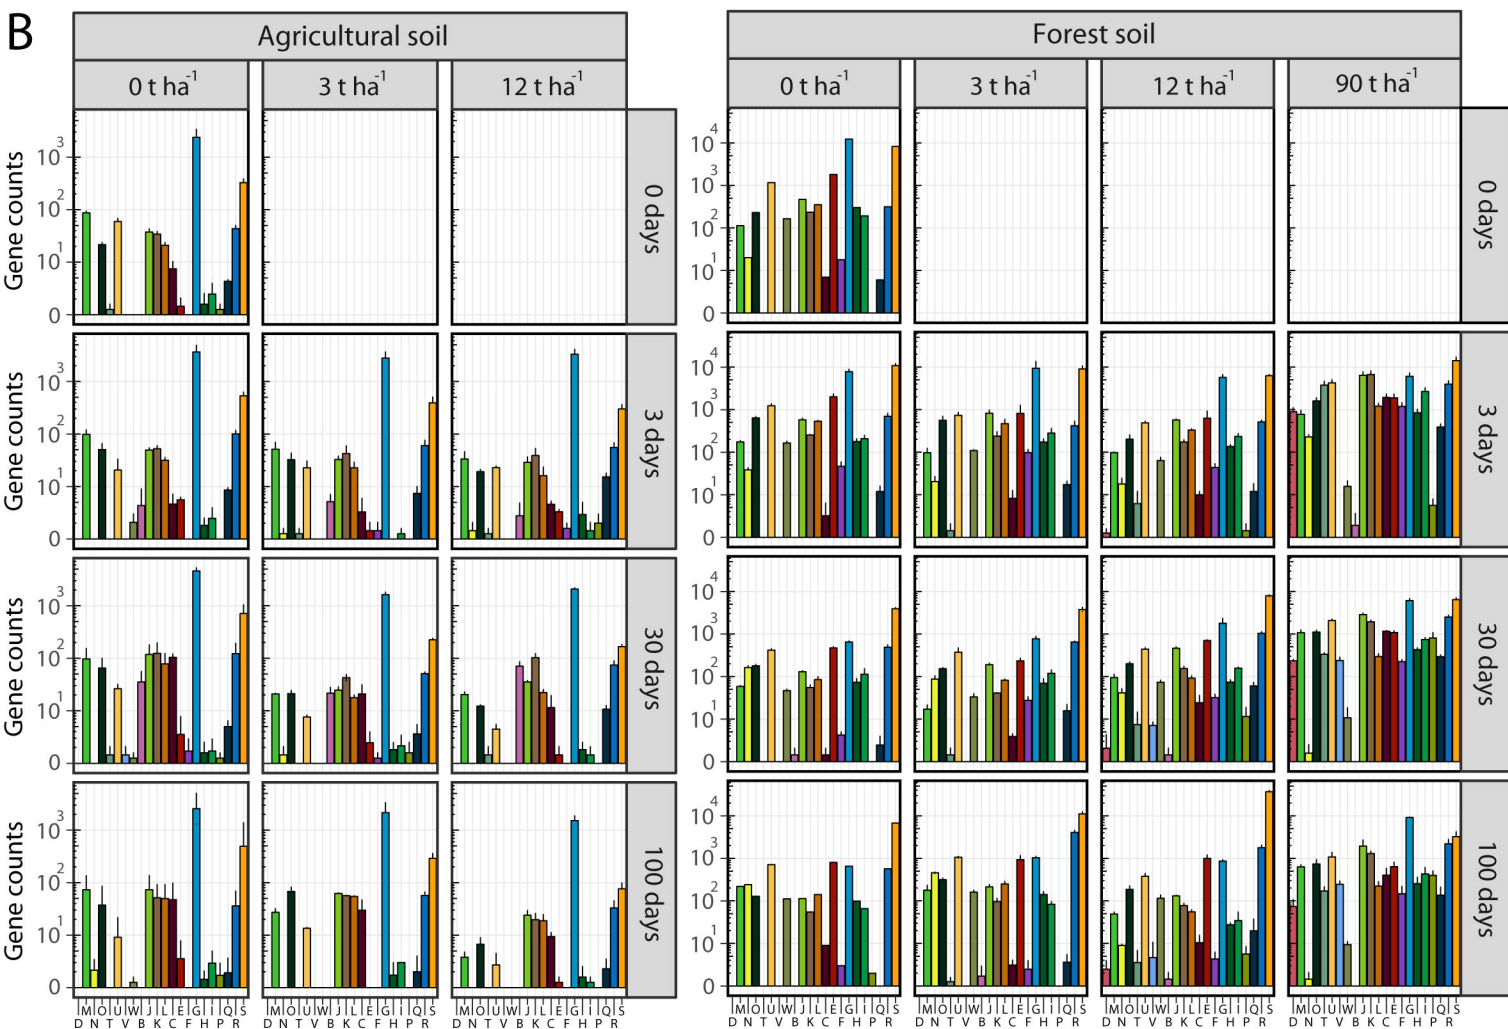

**Gene categories**

**Cellular processes and signalling:**

- [D] Cell cycle control, cell division, chromosome partitioning
- [M] Cell wall/membrane/envelope biogenesis
- [N] Cell motility
- [O] Post-translational modification, protein turnover, and chaperones
- [T] Signal transduction mechanisms
- [U] Intracellular trafficking, secretion, and vesicular transport
- [V] Defense mechanisms
- [W] Extracellular structures
- [B] Chromatin structure and dynamics

**Information storage and processing:**

- [J] Translation, ribosomal structure and biogenesis
  - [K] Transcription
  - [L] Replication, recombination and repair
- Metabolism:**
- [C] Energy production and conversion
  - [E] Amino acid transport and metabolism
  - [F] Nucleotide transport and metabolism
  - [G] Carbohydrate transport and metabolism
  - [H] Coenzyme transport and metabolism

**Metabolism (continued):**

- [I] Lipid transport and metabolism
- [P] Inorganic ion transport and metabolism
- [Q] Secondary metabolites biosynthesis, transport, and catabolism

**Poorly characterized:**

- [R] General function prediction only
- [S] Function unknown

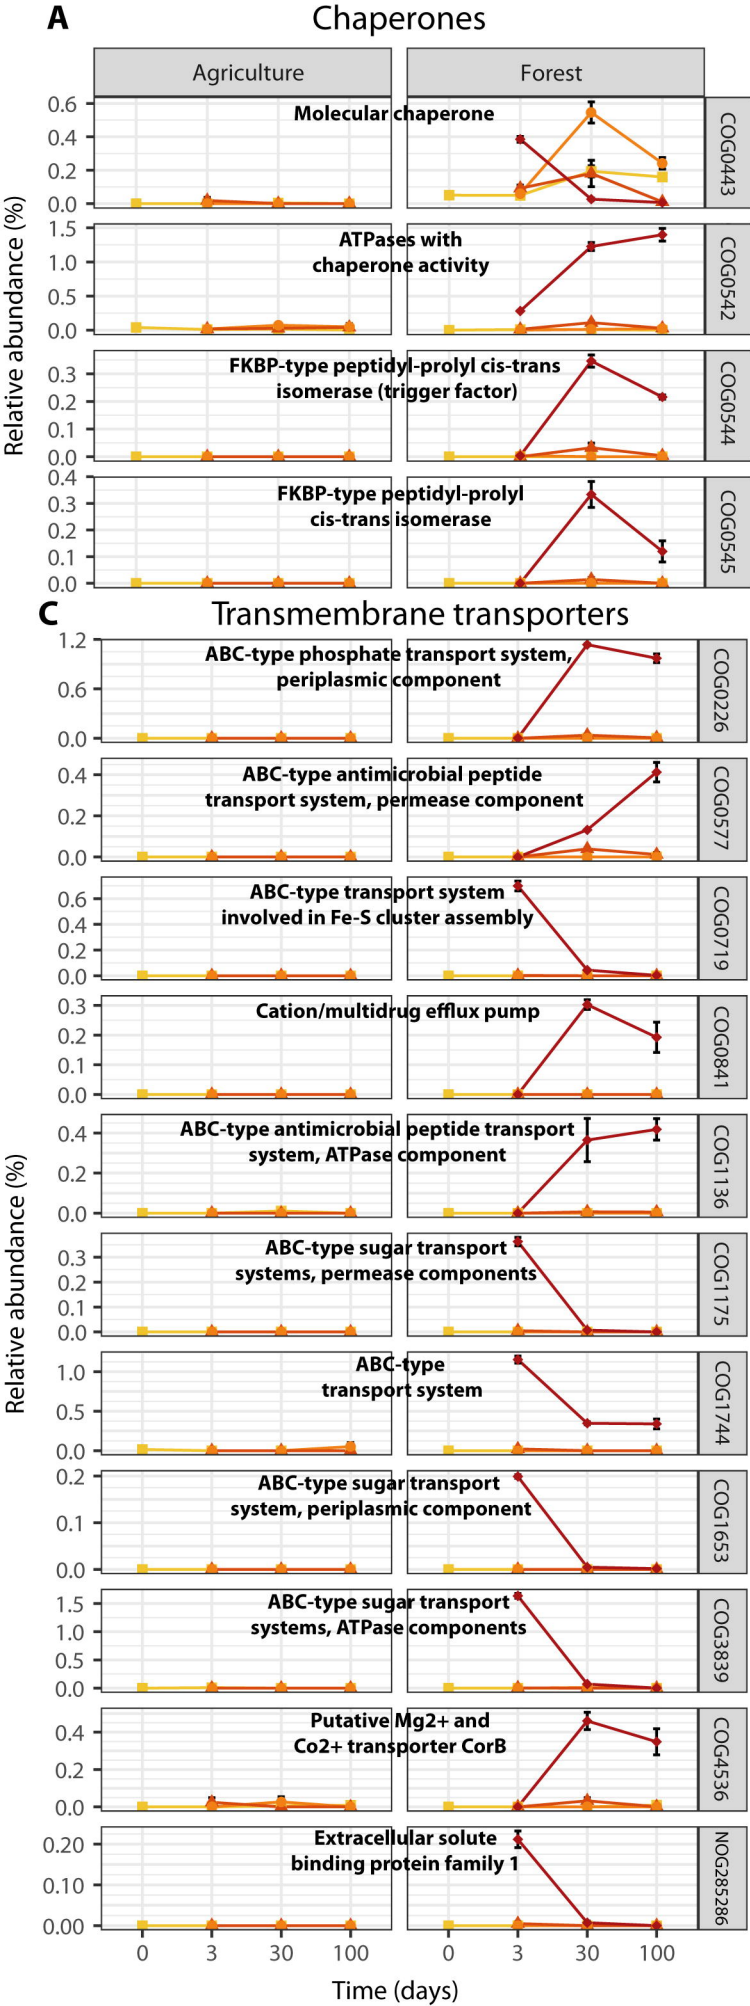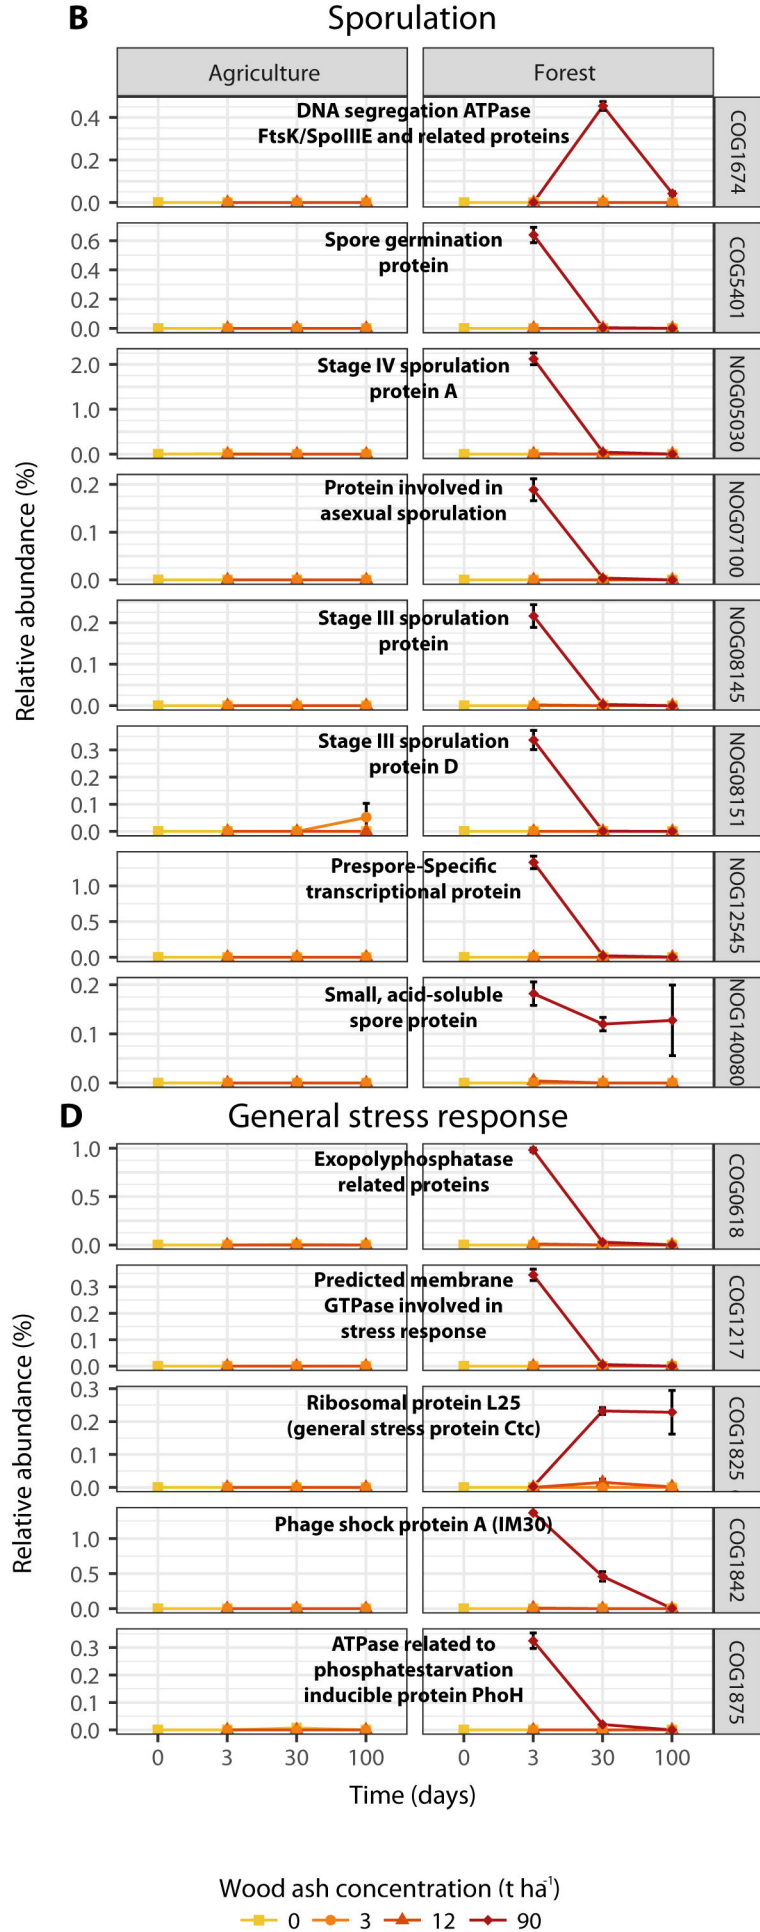

Source: https://www.biorxiv.org/content/10.1101/621557v1.full.pdf
